# Supplementary material
Source: publisher figshare collection journal article supplement (https://acs.figshare.com/ndownloader/files/3938434)
Supplement: Supplementary file 1 [file 3938434]

*Supporting Information*

*For*

**Copper-catalyzed regioselective formation of tri- and  
tetra-substituted vinylboronates in air**

Bidal, Y. D.; Lazreg, F.; Cazin, C. S. J.

EaStCHEM School of Chemistry, University of St Andrews  
St Andrews, KY16 9ST (UK)  
Fax: +44 (0) 1334 463808  
E-mail: [cc111@st-andrews.ac.uk](mailto:cc111@st-andrews.ac.uk)

Homepage: [http://chemistry.st-andrews.ac.uk/staff/cc/group/CSJ\\_Cazin/CSJC.html](http://chemistry.st-andrews.ac.uk/staff/cc/group/CSJ_Cazin/CSJC.html)

## Contents

|                                                                                                                       |     |
|-----------------------------------------------------------------------------------------------------------------------|-----|
| 1. Synthesis of starting materials .....                                                                              | S3  |
| 1.1. Generalities .....                                                                                               | S3  |
| 1.2. Synthesis of internal alkynes <b>5-9</b> .....                                                                   | S3  |
| 1.2.1 Preparation of <b>5</b> .....                                                                                   | S4  |
| 1.2.2 Preparation of <b>7</b> .....                                                                                   | S4  |
| 1.2.3. Preparation of <b>8</b> .....                                                                                  | S5  |
| 1.2.4. Preparation of <b>9</b> .....                                                                                  | S6  |
| 1.2.5. Preparation of <b>6</b> .....                                                                                  | S6  |
| 2. General procedure for the $\beta$ -hydroboration of internal alkynes.....                                          | S7  |
| 2.1. Procedure for Table 1. ....                                                                                      | S7  |
| Optimization of reaction conditions.....                                                                              | S7  |
| 2.2. General procedure for Table 2. ....                                                                              | S11 |
| 2.3. General procedure for Scheme 2. ....                                                                             | S11 |
| 3. General procedure for the carboboration of internal alkynes .....                                                  | S15 |
| 3.1. General procedure for Table 3. ....                                                                              | S15 |
| 3.2. General procedure for Scheme 4. ....                                                                             | S16 |
| 4. General procedure for $\alpha$ -hydroboration of internal alkynes .....                                            | S21 |
| 4.1. General procedure for Table 4. ....                                                                              | S21 |
| 4.2. General procedure for Table 5. ....                                                                              | S21 |
| 4.3. General procedure for Scheme 6. ....                                                                             | S22 |
| 5. $^1\text{H}$ and $^{13}\text{C}\{-^1\text{H}\}$ NMR spectra .....                                                  | S27 |
| $^1\text{H}$ and $^{13}\text{C}\{-^1\text{H}\}$ NMR spectra of products <b>1a-9a</b> .....                            | S27 |
| $^1\text{H}$ and $^{13}\text{C}\{-^1\text{H}\}$ NMR spectra of products <b>1b-9b</b> , <b>8d</b> and <b>8f</b> . .... | S31 |
| $^1\text{H}$ and $^{13}\text{C}\{-^1\text{H}\}$ NMR spectra of products <b>1c-9c</b> .....                            | S38 |
| 6. References.....                                                                                                    | S43 |

## 1. Synthesis of starting materials.

### 1.1. Generalities

Reactions were performed in air (unless otherwise stated) and solvents were dispensed from a solvent purification system. Bis-(pinacolato)diboron was used as received. Pinacolborane was used as received and stored at -20°C under argon. NHC-Cu complexes<sup>[1]</sup> and [PdCl<sub>2</sub>(PPh<sub>3</sub>)<sub>2</sub>]<sup>[2]</sup> were synthesized according to published procedures. Internal alkynes were used as received or prepared according to literature procedures.<sup>[3]</sup> <sup>1</sup>H and <sup>13</sup>C-<sup>1</sup>H Nuclear Magnetic Resonance (NMR) spectra were recorded on a Bruker AVANCE 400 Ultrashield spectrometer or on a Bruker AVANCE 300 spectrometer using the residual solvent peak as reference (CDCl<sub>3</sub>: δ<sub>H</sub> = 7.26 ppm, δ<sub>C</sub> = 77.16 ppm) at 298K. Gas chromatography (GC) analyses were performed on an Agilent 7890A apparatus equipped with a flame ionization detector and a (5%-Phenyl)-methylpolysiloxane column (30 m, 320 μm, film: 0.25 μm). Flash chromatography was performed on silica gel 60 Å pore diameter and 40-63 μm particle size. Elemental analyses were performed at London Metropolitan University Service 166-220 Holloway Road, London, N7 8DB. Mass spectroscopy was performed by the EPSRC National Mass Spectrometry Service Centre at Swansea University, Grove Building, Singleton Park, Swansea, SA2 8PP, Wales, UK.

### 1.2. Synthesis of internal alkynes 5-9

[Pd(Cl)<sub>2</sub>(PPh<sub>3</sub>)<sub>2</sub>] was synthesized according to a published procedure.<sup>[2]</sup> Alkynes **5**, **7**, **8**, **9** were synthesised according to a general procedure shown below. **6** was synthesised according to a similar method of the literature.<sup>[3]</sup>

A Schlenk flask was charged with THF (20 mL), triethylamine (10 mL), aryl iodide, alkyne, [PdCl<sub>2</sub>(PPh<sub>3</sub>)<sub>2</sub>] and CuI. The reaction mixture was stirred overnight at the indicated temperature, allowed to cool to rt and quenched with MeOH (10 mL). The solution was concentrated *in vacuo* and Et<sub>2</sub>O (100 mL) was added. After filtration, the filtrate was washed with 1N HCl<sub>(aq.)</sub> and H<sub>2</sub>O. The organic layer was dried over MgSO<sub>4</sub>, filtered and the solvent was removed *in vacuo*. The crude product was purified by column chromatography (SiO<sub>2</sub>).

### 1.2.1 Preparation of **5**

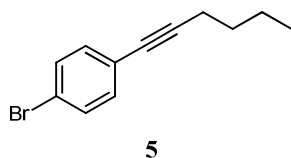

[PdCl<sub>2</sub>(PPh<sub>3</sub>)<sub>2</sub>] (50.0 mg, 0.070 mmol), CuI (13.5 mg, 0.070 mmol), 1-bromo-4-iodobenzene (4.0 g, 14.0 mmol), 1-hexyne (1.8 mL, 15.4 mmol, 1.1 equiv.) were charged in a Schlenk flask and stirred at RT for 48 h.

Flash chromatography (SiO<sub>2</sub>, pentane/ethyl acetate 10:1) afforded 1.6 g of the title compound **5** (48 %) as a yellowish oil.

**<sup>1</sup>H NMR (300 MHz, CDCl<sub>3</sub>, 298 K):**  $\delta$  = 7.35 (d, <sup>3</sup>*J*(H,H) = 8.5 Hz, 2H, CH phenyl), 7.20 (d, <sup>3</sup>*J*(H,H) = 8.5 Hz, 2H, CH phenyl), 2.35 (t, <sup>3</sup>*J*(H,H) = 6.9 Hz, 2H, CH<sub>2</sub>), 1.59 -1.49 (m, 2H, CH<sub>2</sub>), 1.48-1.37 (m, 2H, CH<sub>2</sub>), 0.91 (t, <sup>3</sup>*J*(H,H) = 7.2 Hz, 3H, CH<sub>3</sub>).

**<sup>13</sup>C-{<sup>1</sup>H} NMR (75 MHz, CDCl<sub>3</sub>, 298 K):**  $\delta$  = 133.0 (s, CH phenyl), 131.4 (s, CH phenyl), 123.2 (s, C<sup>IV</sup> phenyl), 121.6 (s, C<sup>IV</sup> phenyl), 91.7 (s, C<sup>IV</sup>), 79.7 (s, C<sup>IV</sup>), 30.8 (s, CH<sub>2</sub>), 22.1 (s, CH<sub>2</sub>), 19.2 (s, CH<sub>2</sub>), 13.7 (s, CH<sub>3</sub>).

These data were compared and found similar to literature values.<sup>[3]</sup>

### 1.2.2 Preparation of **7**

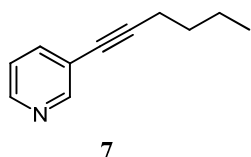

[PdCl<sub>2</sub>(PPh<sub>3</sub>)<sub>2</sub>] (50.0 mg, 0.070 mmol), CuI (13.5 mg, 0.070 mmol), 3-iodopyridine (3.0 g, 14.6 mmol), 1-hexyne (2.0 mL, 17.4 mmol, 1.2 equiv.) were charged in a Schlenk flask and stirred at 50°C for 24 h.

Flash chromatography (SiO<sub>2</sub>, pentane) afforded 2.1 g of the title compound **7** (90 %) as a dark orange oil.

**<sup>1</sup>H NMR (400 MHz, CDCl<sub>3</sub>, 298 K):**  $\delta$  = 8.56 (br. s, 1H, CH Ar), 8.42 - 8.39 (m, 1H, CH Ar), 7.60 - 7.58 (dt, <sup>3</sup>*J*(H,H) = 8.1 Hz, <sup>4</sup>*J*(H,H) = 1.9 Hz, 1H, CH Ar), 7.14 - 7.10 (dd,

$^3J(\text{H,H}) = 8.1 \text{ Hz}$ ,  $^4J(\text{H,H}) = 5.0 \text{ Hz}$ , 1H, CH Ar), 2.35 (t,  $^3J(\text{H,H}) = 7.1 \text{ Hz}$ , 2H, CH<sub>2</sub>), 1.56-1.36 (m, 4H, CH<sub>2</sub>), 0.88 (t,  $^3J(\text{H,H}) = 7.3 \text{ Hz}$ , 3H, CH<sub>3</sub>).

**$^{13}\text{C}\{-^1\text{H}\}$  NMR (75 MHz, CDCl<sub>3</sub>, 298 K):**  $\delta = 152.3$  (s, CH Ar), 147.9 (s, CH Ar), 138.3 (s, CH Ar), 122.9 (s, CH Ar), 121.2 (s, C<sup>IV</sup> Ar), 94.1 (s, C<sup>IV</sup>), 77.3 (s, C<sup>IV</sup>), 30.6 (s, CH<sub>2</sub>), 22.0 (s, CH<sub>2</sub>), 19.1 (s, CH<sub>2</sub>), 13.6 (s, CH<sub>3</sub>).

These data were compared and found similar to literature values.<sup>[3]</sup>

### 1.2.3. Preparation of **8**

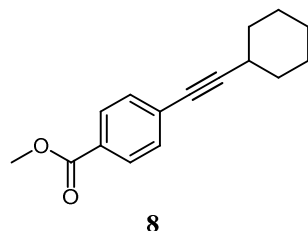

[PdCl<sub>2</sub>(PPh<sub>3</sub>)<sub>2</sub>] (50.0 mg, 0.070 mmol), CuI (13.5 mg, 0.070 mmol), 4-iodo-methylbenzoate (4.0 g, 15.3 mmol), cyclohexylacetylene (2.4 mL, 18.3 mmol, 1.2 equiv.) were charged in a Schlenk flask and stirred at 50°C for 24 h.

Flash chromatography (SiO<sub>2</sub>, pentane/ethyl acetate 10:1) afforded 3.5 g of the title compound **8** (94 %) as an orange solid.

**$^1\text{H}$  NMR (300 MHz, CDCl<sub>3</sub>, 298 K):**  $\delta = 7.98 - 7.92$  (d,  $^3J(\text{H,H}) = 8.1 \text{ Hz}$ , 2H, CH phenyl), 7.48 - 7.42 (d,  $^3J(\text{H,H}) = 8.1 \text{ Hz}$ , 2H, CH phenyl), 3.90 (s, 3H, OCH<sub>3</sub>), 2.66 - 2.55 (m, 1H, CH), 1.93 - 1.84 (m, 2H, CH<sub>2</sub>), 1.81 - 1.69 (m, 2H, CH<sub>2</sub>), 1.63 - 1.48 (m, 3H, CH<sub>2</sub>), 1.43 - 1.30 (m, 3H, CH<sub>2</sub>).

**$^{13}\text{C}\{-^1\text{H}\}$  NMR (75 MHz, CDCl<sub>3</sub>, 298 K):**  $\delta = 166.8$  (s, C<sup>IV</sup> carbonyl), 131.6 (s, CH phenyl), 129.5 (s, CH phenyl), 129.1 (s, C<sup>IV</sup> phenyl), 128.8 (s, C<sup>IV</sup> phenyl), 98.0 (s, C<sup>IV</sup>), 80.2 (s, C<sup>IV</sup>), 52.2 (s, CH<sub>3</sub>), 32.6 (s, CH), 29.9 (s, CH<sub>2</sub>), 26.0 (s, CH<sub>2</sub>), 25.0 (s, CH<sub>2</sub>).

These data were compared and found similar to literature values.<sup>[3]</sup>

#### 1.2.4. Preparation of **9**

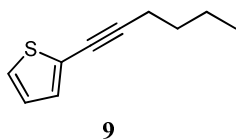

[PdCl<sub>2</sub>(PPh<sub>3</sub>)<sub>2</sub>] (75.0 mg, 0.105 mmol), CuI (13.5 mg, 0.070 mmol), 2-iodo-thiophene (1.55 mL, 14.0 mmol), 1-hexyne (1.8 mL, 15.4 mmol, 1.1 equiv.) were charged in a Schlenk flask and stirred at 50°C for 24 h.

Flash chromatography (SiO<sub>2</sub>, pentane) afforded 2.1 g of the title compound **9** (90 %) as a brown liquid.

**<sup>1</sup>H NMR (400 MHz, CDCl<sub>3</sub>, 298 K):**  $\delta$  = 7.17 - 7.16 (dd, <sup>3</sup>*J*(H,H) = 5.3 Hz, <sup>4</sup>*J*(H,H) = 1.2 Hz, 1H, CH Ar), 7.12 - 7.11 (m, 1H, CH Ar), 6.95 - 6.92 (dd, <sup>3</sup>*J*(H-H) = 5.3 Hz, <sup>3</sup>*J*(H,H) = 3.7 Hz, 1H, CH Ar), 2.43 (t, <sup>3</sup>*J*(H,H) = 7.0 Hz, 2H, CH<sub>2</sub>), 1.63 - 1.56 (m, 2H, CH<sub>2</sub>), 1.52 - 1.43 (m, 2H, CH<sub>2</sub>), 0.95 (t, <sup>3</sup>*J*(H,H) = 7.3 Hz, 3H, CH<sub>3</sub>).

**<sup>13</sup>C-{<sup>1</sup>H} NMR (75 MHz, CDCl<sub>3</sub>, 298 K):**  $\delta$  = 131.0 (s, CH Ar), 126.9 (s, CH Ar), 125.9 (s, CH Ar), 124.4 (s, C<sup>IV</sup>Ar), 94.6 (s, C<sup>IV</sup>), 73.8 (s, C<sup>IV</sup>), 30.8 (s, CH<sub>2</sub>), 22.2 (s, CH<sub>2</sub>), 19.5 (s, CH<sub>2</sub>), 13.7 (s, CH<sub>3</sub>).

These data were compared and found similar to literature values.<sup>[3]</sup>

#### 1.2.5. Preparation of **6**

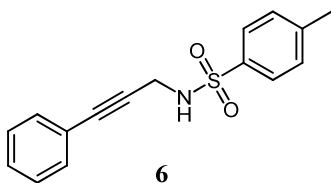

A Schlenk flask was charged with 3-phenyl-2-propyn-1-amine hydrochloride (2.0 g, 11.9 mmol), tosylchloride (2.5 g, 13.1 mmol, 1.1 equiv.), DMAP (40.0 mg, 0.33 mmol) and dichloromethane (20 mL). Triethylamine was added dropwise (5.0 mL, 35.7 mmol, 3.0 equiv.). The reaction mixture was stirred at room temperature for 14 hours. The organic layer was washed with saturated NH<sub>4</sub>Cl<sub>(aq)</sub> (1 x 20 mL) and H<sub>2</sub>O (1 x 20 mL), dried over MgSO<sub>4</sub>, filtered and the solvent was removed *in vacuo*. Flash chromatography (SiO<sub>2</sub>, pentane/ethyl acetate 8:2) afforded 2.0 g of the title compound **6** (59 %) as a colorless solid.

**<sup>1</sup>H NMR (300 MHz, CDCl<sub>3</sub>, 298 K):**  $\delta$  = 7.81 (d, <sup>3</sup>*J*(H,H) = 8.4 Hz, 2H, CH phenyl), 7.30 -7.22 (m, 5H, CH phenyl), 7.15 - 7.11 (dd, <sup>3</sup>*J*(H,H) = 8.4 Hz, <sup>4</sup>*J*(H,H) = 1.3 Hz, 2H, CH phenyl), 4.63 (br. s, 1H, NH), 4.08 (d, <sup>3</sup>*J*(H,H) = 5.6 Hz, 2H, CH<sub>2</sub>), 2.36 (s, 3H, CH<sub>3</sub>).

**<sup>13</sup>C-{<sup>1</sup>H} NMR (75 MHz, CDCl<sub>3</sub>, 298 K):**  $\delta$  = 143.9 (s, C<sup>IV</sup> phenyl), 137.0 (s, C<sup>IV</sup> phenyl), 131.7 (s, CH phenyl), 129.8 (s, CH phenyl), 128.6 (s, CH phenyl), 128.3 (s, CH phenyl), 127.6 (s, CH phenyl), 122.2 (s, C<sup>IV</sup> phenyl), 84.8 (s, C<sup>IV</sup>), 83.3 (s, C<sup>IV</sup>), 33.9 (s, CH<sub>2</sub>), 21.6 (s, CH<sub>3</sub>).

These data were compared and found similar to literature values.<sup>[4]</sup>

## 2. General procedure for the $\beta$ -hydroboration of internal alkynes.

### 2.1. Procedure for Table 1.

In a glovebox, a vial was charged with the Cu catalyst, the base (0.2 mmol), bis-(pinacolato)diboron (2.2 mmol, 0.558 g, 1.1 equiv.), 1-phenyl-1-butyne **1** (2.0 mmol, 0.284 mL), the solvent (2.4 mL) and MeOH (0.180 mL, 2 equiv.). At low catalyst loading, a stock solution of Cu was prepared (0.005 mmol in CH<sub>2</sub>Cl<sub>2</sub> (3.3 mL)). CH<sub>2</sub>Cl<sub>2</sub> was removed *in vacuo* before addition of the other reagents. The reaction mixture was stirred at 25°C for 16 h under inert atmosphere. The conversion was determined by GC. The volatiles were removed *in vacuo* and the products were obtained after purification by column chromatography (SiO<sub>2</sub>). The regioselectivity of the reaction was determined by <sup>1</sup>H NMR.

### Optimization of reaction conditions

| Catalyst      | Loading<br>(ppm) | Base                | Loading<br>(mol%) | Solvent    | Conversion<br>(%) |
|---------------|------------------|---------------------|-------------------|------------|-------------------|
| [Cu(Cl)(IPr)] | 50000            | NaO <sup>t</sup> Bu | 5                 | THF        | 99                |
| [Cu(Cl)(IPr)] | 20000            | NaO <sup>t</sup> Bu | 2                 | THF        | 99                |
| [Cu(Cl)(IPr)] | 10000            | NaO <sup>t</sup> Bu | 1                 | THF        | 99                |
| [Cu(Cl)(IPr)] | 5000             | NaO <sup>t</sup> Bu | 1                 | THF        | 99                |
| [Cu(Cl)(IPr)] | 1000             | NaO <sup>t</sup> Bu | 1                 | THF        | 99                |
| [Cu(Cl)(IPr)] | 250              | NaO <sup>t</sup> Bu | 1                 | THF        | 26                |
| [Cu(Cl)(IPr)] | 250              | NaO <sup>t</sup> Bu | 1                 | Methyl THF | 30                |
| [Cu(Cl)(IPr)] | 250              | NaO <sup>t</sup> Bu | 1                 | toluene    | 13                |

|                                                            |     |                     |   |                  |    |
|------------------------------------------------------------|-----|---------------------|---|------------------|----|
| [Cu(Cl)(IPr)]                                              | 250 | NaO <sup>t</sup> Bu | 1 | DME              | 20 |
| [Cu(Cl)(IPr)]                                              | 250 | NaO <sup>t</sup> Bu | 1 | MTBE             | 24 |
| [Cu(Cl)(IPr)]                                              | 250 | NaO <sup>t</sup> Bu | 1 | DCM              | 22 |
| [Cu(Cl)(IPr)]                                              | 250 | NaO <sup>t</sup> Bu | 1 | Dioxane          | 29 |
| [Cu(Cl)(IPr)]                                              | 250 | NaO <sup>t</sup> Bu | 1 | DMSO             | 31 |
| [Cu(Cl)(IPr)]                                              | 250 | NaO <sup>t</sup> Bu | 1 | <i>i</i> PrOH    | 34 |
| [CuIPr)(I <sup>t</sup> Bu)(BF <sub>4</sub> )               | 250 | /                   | / | Methyl THF       | 11 |
| [CuIPr)(I <sup>t</sup> Bu)(BF <sub>4</sub> )               | 250 | /                   | / | Toluene          | 9  |
| [CuIPr)(I <sup>t</sup> Bu)(BF <sub>4</sub> )               | 250 | /                   | / | THF              | 9  |
| [CuIPr)(I <sup>t</sup> Bu)(BF <sub>4</sub> )               | 250 | /                   | / | DME              | 7  |
| [CuIPr)(I <sup>t</sup> Bu)(BF <sub>4</sub> )               | 250 | /                   | / | H <sub>2</sub> O | 3  |
| [CuIPr)(I <sup>t</sup> Bu)(BF <sub>4</sub> )               | 250 | /                   | / | MTBE             | 18 |
| [CuIPr)(I <sup>t</sup> Bu)(BF <sub>4</sub> )               | 250 | /                   | / | DCM              | 0  |
| [CuIPr)(I <sup>t</sup> Bu)(BF <sub>4</sub> )               | 250 | /                   | / | Dioxane          | 11 |
| [CuIPr)(I <sup>t</sup> Bu)(BF <sub>4</sub> )               | 250 | /                   | / | DMSO             | 2  |
| [CuIPr)(I <sup>t</sup> Bu)(BF <sub>4</sub> )               | 250 | /                   | / | <i>i</i> PrOH    | 2  |
| [CuIPr)(I <sup>t</sup> Bu)(BF <sub>4</sub> )               | 250 | /                   | / | ethanol          | 2  |
| [CuIPr)(P <sup>t</sup> Bu <sub>3</sub> )(BF <sub>4</sub> ) | 250 | /                   | / | Methyl-THF       | 5  |
| [CuIPr)(P <sup>t</sup> Bu <sub>3</sub> )(BF <sub>4</sub> ) | 250 | /                   | / | Toluene          | 6  |
| [CuIPr)(P <sup>t</sup> Bu <sub>3</sub> )(BF <sub>4</sub> ) | 250 | /                   | / | THF              | 4  |
| [CuIPr)(P <sup>t</sup> Bu <sub>3</sub> )(BF <sub>4</sub> ) | 250 | /                   | / | DME              | 4  |
| [CuIPr)(P <sup>t</sup> Bu <sub>3</sub> )(BF <sub>4</sub> ) | 250 | /                   | / | MTBE             | 15 |
| [CuIPr)(P <sup>t</sup> Bu <sub>3</sub> )(BF <sub>4</sub> ) | 250 | /                   | / | DCM              | 0  |
| [CuIPr)(P <sup>t</sup> Bu <sub>3</sub> )(BF <sub>4</sub> ) | 250 | /                   | / | Dioxane          | 6  |
| [CuIPr)(P <sup>t</sup> Bu <sub>3</sub> )(BF <sub>4</sub> ) | 250 | /                   | / | DMSO             | 0  |
| [CuIPr)(P <sup>t</sup> Bu <sub>3</sub> )(BF <sub>4</sub> ) | 250 | /                   | / | <i>i</i> PrOH    | 3  |
| [Cu(Cl)(I <sup>t</sup> Bu)]                                | 250 | NaO <sup>t</sup> Bu | 1 | Methyl THF       | 62 |
| [Cu(Cl)(I <sup>t</sup> Bu)]                                | 250 | NaO <sup>t</sup> Bu | 1 | Toluene          | 43 |
| [Cu(Cl)(I <sup>t</sup> Bu)]                                | 250 | NaO <sup>t</sup> Bu | 1 | THF              | 55 |
| [Cu(Cl)(I <sup>t</sup> Bu)]                                | 250 | NaO <sup>t</sup> Bu | 1 | DME              | 50 |
| [Cu(Cl)(I <sup>t</sup> Bu)]                                | 250 | NaO <sup>t</sup> Bu | 1 | MTBE             | 42 |
| [Cu(Cl)(I <sup>t</sup> Bu)]                                | 250 | NaO <sup>t</sup> Bu | 1 | DCM              | 48 |



|                             |     |                     |   |               |    |
|-----------------------------|-----|---------------------|---|---------------|----|
| [Cu(Cl)(I <sup>t</sup> Bu)] | 250 | NaO <sup>t</sup> Bu | 1 | Dioxane       | 67 |
| [Cu(Cl)(I <sup>t</sup> Bu)] | 250 | NaO <sup>t</sup> Bu | 1 | DMSO          | 12 |
| [Cu(Cl)(I <sup>t</sup> Bu)] | 250 | NaO <sup>t</sup> Bu | 1 | <i>i</i> PrOH | 46 |
| [Cu(Cl)(ICy)]               | 250 | NaO <sup>t</sup> Bu | 1 | Methyl THF    | 63 |
| [Cu(Cl)(ICy)]               | 250 | NaO <sup>t</sup> Bu | 1 | Toluene       | 57 |
| [Cu(Cl)(ICy)]               | 250 | NaO <sup>t</sup> Bu | 1 | THF           | 69 |
| [Cu(Cl)(ICy)]               | 250 | NaO <sup>t</sup> Bu | 1 | DME           | 69 |
| [Cu(Cl)(ICy)]               | 250 | NaO <sup>t</sup> Bu | 1 | MTBE          | 65 |
| [Cu(Cl)(ICy)]               | 250 | NaO <sup>t</sup> Bu | 1 | DCM           | 76 |
| [Cu(Cl)(ICy)]               | 250 | NaO <sup>t</sup> Bu | 1 | Dioxane       | 74 |
| [Cu(Cl)(ICy)]               | 250 | NaO <sup>t</sup> Bu | 1 | DMSO          | 23 |
| [Cu(Cl)(ICy)]               | 250 | NaO <sup>t</sup> Bu | 1 | <i>i</i> PrOH | 70 |
| [Cu(Cl)(SIMes)]             | 250 | NaO <sup>t</sup> Bu | 1 | Methyl THF    | 95 |
| [Cu(Cl)(SIMes)]             | 250 | NaO <sup>t</sup> Bu | 1 | Toluene       | 95 |
| [Cu(Cl)(SIMes)]             | 250 | NaO <sup>t</sup> Bu | 1 | THF           | 98 |
| [Cu(Cl)(SIMes)]             | 250 | NaO <sup>t</sup> Bu | 1 | DME           | 97 |
| [Cu(Cl)(SIMes)]             | 250 | NaO <sup>t</sup> Bu | 1 | MTBE          | 97 |
| [Cu(Cl)(SIMes)]             | 250 | NaO <sup>t</sup> Bu | 1 | DCM           | 90 |
| [Cu(Cl)(SIMes)]             | 250 | NaO <sup>t</sup> Bu | 1 | Dioxane       | 96 |
| [Cu(Cl)(SIMes)]             | 250 | NaO <sup>t</sup> Bu | 1 | DMSO          | 81 |
| [Cu(Cl)(SIMes)]             | 250 | NaO <sup>t</sup> Bu | 1 | <i>i</i> PrOH | 96 |
| [Cu(Cl)(IMes)]              | 250 | NaO <sup>t</sup> Bu | 1 | Methyl THF    | 99 |
| [Cu(Cl)(IMes)]              | 250 | NaO <sup>t</sup> Bu | 1 | Toluene       | 92 |
| [Cu(Cl)(IMes)]              | 250 | NaO <sup>t</sup> Bu | 1 | THF           | 99 |
| [Cu(Cl)(IMes)]              | 250 | NaO <sup>t</sup> Bu | 1 | DME           | 93 |
| [Cu(Cl)(IMes)]              | 250 | NaO <sup>t</sup> Bu | 1 | MTBE          | 96 |
| [Cu(Cl)(IMes)]              | 250 | NaO <sup>t</sup> Bu | 1 | DCM           | 92 |
| [Cu(Cl)(IMes)]              | 250 | NaO <sup>t</sup> Bu | 1 | Dioxane       | 94 |
| [Cu(Cl)(IMes)]              | 250 | NaO <sup>t</sup> Bu | 1 | DMSO          | 80 |
| [Cu(Cl)(IMes)]              | 250 | NaO <sup>t</sup> Bu | 1 | <i>i</i> PrOH | 95 |
| [Cu(Cl)(SIMes)]             | 125 | NaO <sup>t</sup> Bu | 1 | Methyl THF    | 99 |
| [Cu(Cl)(SIMes)]             | 125 | NaO <sup>t</sup> Bu | 1 | Toluene       | 96 |

|                 |     |                     |   |               |    |
|-----------------|-----|---------------------|---|---------------|----|
| [Cu(Cl)(SImes)] | 125 | NaO <sup>t</sup> Bu | 1 | THF           | 95 |
| [Cu(Cl)(SImes)] | 125 | NaO <sup>t</sup> Bu | 1 | DME           | 89 |
| [Cu(Cl)(SImes)] | 125 | NaO <sup>t</sup> Bu | 1 | MTBE          | 97 |
| [Cu(Cl)(SImes)] | 125 | NaO <sup>t</sup> Bu | 1 | Dioxane       | 97 |
| [Cu(Cl)(SImes)] | 125 | NaO <sup>t</sup> Bu | 1 | <i>i</i> PrOH | 87 |
| [Cu(Cl)(SImes)] | 50  | NaO <sup>t</sup> Bu | 1 | Methyl THF    | 69 |
| [Cu(Cl)(SImes)] | 50  | NaO <sup>t</sup> Bu | 1 | Toluene       | 89 |
| [Cu(Cl)(SImes)] | 50  | NaO <sup>t</sup> Bu | 1 | THF           | 76 |
| [Cu(Cl)(SImes)] | 50  | NaO <sup>t</sup> Bu | 1 | MTBE          | 93 |
| [Cu(Cl)(SImes)] | 50  | NaO <sup>t</sup> Bu | 1 | dioxane       | 81 |
| [Cu(Cl)(SImes)] | 50  | KO <sup>t</sup> Bu  | 1 | MTBE          | 87 |
| [Cu(Cl)(SImes)] | 50  | CsOH                | 1 | MTBE          | 89 |
| [Cu(Cl)(SImes)] | 50  | KOH                 | 1 | MTBE          | 93 |
| [Cu(Cl)(SImes)] | 50  | NaOH                | 1 | MTBE          | 95 |
| [Cu(Cl)(SImes)] | 50  | NaOMe               | 1 | MTBE          | 74 |
| [Cu(Cl)(SImes)] | 50  | K <sup>t</sup> Am   | 1 | MTBE          | 91 |
| [Cu(Cl)(IMes)]  | 125 | NaO <sup>t</sup> Bu | 1 | Methyl THF    | 98 |
| [Cu(Cl)(IMes)]  | 125 | NaO <sup>t</sup> Bu | 1 | THF           | 97 |
| [Cu(Cl)(IMes)]  | 125 | NaO <sup>t</sup> Bu | 1 | MTBE          | 96 |
| [Cu(Cl)(IMes)]  | 125 | NaO <sup>t</sup> Bu | 1 | Dioxane       | 96 |
| [Cu(Cl)(IMes)]  | 125 | NaO <sup>t</sup> Bu | 1 | <i>i</i> PrOH | 91 |
| [Cu(Cl)(IMes)]  | 50  | NaO <sup>t</sup> Bu | 1 | Methyl THF    | 87 |
| [Cu(Cl)(IMes)]  | 50  | NaO <sup>t</sup> Bu | 1 | THF           | 87 |
| [Cu(Cl)(IMes)]  | 50  | NaO <sup>t</sup> Bu | 1 | MTBE          | 92 |
| [Cu(Cl)(IMes)]  | 50  | NaO <sup>t</sup> Bu | 1 | dioxane       | 80 |
| [Cu(Cl)(IMes)]  | 50  | KO <sup>t</sup> Bu  | 1 | MTBE          | 92 |
| [Cu(Cl)(IMes)]  | 50  | CsOH                | 1 | MTBE          | 91 |
| [Cu(Cl)(IMes)]  | 50  | KOH                 | 1 | MTBE          | 92 |
| [Cu(Cl)(IMes)]  | 50  | NaOH                | 1 | MTBE          | 96 |
| [Cu(Cl)(IMes)]  | 50  | NaOMe               | 1 | MTBE          | 93 |
| [Cu(Cl)(IMes)]  | 50  | K <sup>t</sup> Am   | 1 | MTBE          | 92 |
| [Cu(Cl)(IMes)]  | 25  | NaOH                | 1 | MTBE          | 36 |

|                 |    |      |    |      |    |
|-----------------|----|------|----|------|----|
| [Cu(Cl)(IMes)]  | 25 | NaOH | 2  | MTBE | 34 |
| [Cu(Cl)(IMes)]  | 25 | NaOH | 5  | MTBE | 50 |
| [Cu(Cl)(IMes)]  | 25 | NaOH | 10 | MTBE | 31 |
| [Cu(Cl)(SIMes)] | 25 | NaOH | 5  | MTBE | 43 |

## 2.2. General procedure for Table 2.

Catalysts and reagents were stored in air. A vial was charged in air with the Cu catalyst (stock solution 0.005 mmol in 3.3 mL of CH<sub>2</sub>Cl<sub>2</sub>). The latter was evaporated *in vacuo* before addition of the other reagents), the base (0.2 mmol), bis-(pinacolato)diboron (2.2 mmol, 0.558 g, 1.1 equiv.), 1-phenyl-1-butyne **1** (2.0 mmol, 0.284 mL), the solvent (2.4 mL) and MeOH (0.180 mL, 2 equiv.). The vial was closed with a screw-cap, and the reaction mixture was stirred at 25°C for 16 h. The conversion was determined by GC analysis. The volatiles were removed *in vacuo* and the products were purified by column chromatography (SiO<sub>2</sub>). The regioselectivity of the reactions were determined by <sup>1</sup>H NMR.

**(Z)-4,4,5,5-tetramethyl-2-(1-phenylbut-1-en-2-yl)-1,3,2-dioxaborolane 1a.**<sup>[5]</sup>

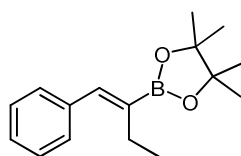

**1a**

After purification (SiO<sub>2</sub>, hexane/ethyl acetate 9:1) **1a** was isolated as a colorless oil in 98 % yield (0.263 g).

**<sup>1</sup>H NMR (300 MHz, CDCl<sub>3</sub>, 298 K, TMS):** δ = 7.34 - 7.22 (m, 5H, CH phenyl), 7.20 (br. s, 1H, CH), 2.39 (d, <sup>3</sup>J(H,H) = 7.6 Hz, 2H, CH<sub>2</sub>), 1.31 (s, 12H), 1.10 (t, <sup>3</sup>J(H,H) = 7.6 Hz, 3H, CH<sub>3</sub>).

## 2.3. General procedure for Scheme 2.

Catalysts and reagents were stored in air. A vial was charged with [Cu(Cl)(IMes)] (stock solution 0.005 mmol in 3.3 mL of CH<sub>2</sub>Cl<sub>2</sub>). The latter was removed *in vacuo* before addition of other reagents), NaOH (0.025 mmol, 1 mg), bis-(pinacolato)diboron (0.55 mmol, 140 mg, 1.1 equiv.), the alkyne (0.5 mmol), CPME (0.6 mL) and MeOH (1.0 mmol, 0.05 mL). The vial was closed with a screw-cap, and the reaction mixture was stirred at 25°C for 16 h.

Conversion was determined by GC analysis. The volatiles were removed *in vacuo* and the products were purified by column chromatography (SiO<sub>2</sub>). The regioselectivity of the reaction was determined by <sup>1</sup>H NMR.

<sup>1</sup>H and <sup>13</sup>C-<sup>1</sup>H NMR data were found similar to literature values for **2a**,<sup>[3]</sup> **3a**,<sup>[6]</sup> **4a**,<sup>[7]</sup> **5a**,<sup>[3]</sup> **7a**,<sup>[3]</sup> **8a**,<sup>[3]</sup> and **9a**.<sup>[3]</sup>

**(Z)-4-(4,4,5,5-Tetramethyl-2-(1-phenylprop-1-en-2-yl)-1,3,2-dioxaborolane, 2a**<sup>[3]</sup>

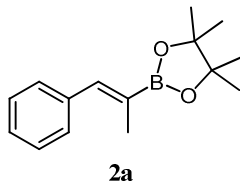

After purification (SiO<sub>2</sub>, hexane/ethyl acetate 15:1) **2a** was isolated as a colorless oil in 98% yield (0.119 g).

**<sup>1</sup>H NMR (300 MHz, CDCl<sub>3</sub>, 298 K):** δ = 7.40 - 7.32 (m, 4H, *CH* phenyl), 7.25 - 7.23 (m, 2H, *CH* phenyl and *CH*), 1.99 (d, *J*(H,H) = 1.8 Hz, 3H, CH<sub>3</sub>), 1.32 (s, 12H).

**(Z)-trimethyl-(2-phenyl-1-(4,4,5,5-Tetramethyl-1,3,2-dioxaborolan-2-yl)vinyl)silane, 3a**<sup>[6]</sup>

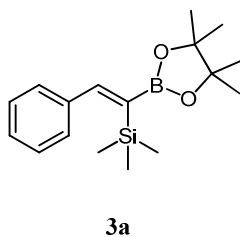

After purification (SiO<sub>2</sub>, pentane) **3a** was isolated as a colorless solid in 70 % yield (0.105 g).

**<sup>1</sup>H NMR (300 MHz, CDCl<sub>3</sub>, 298 K):** δ = 7.39 (br s, 1H, *CH*=C-Si), 7.32 - 7.31 (m, 4H, *CH* phenyl), 7.23 - 7.18 (m, 1H, *CH* phenyl), 1.26 (s, 12H), -0.12 (s, 9H, CH<sub>3</sub>-Si).

**(Z)-4-(4,4,5,5-Tetramethyl-1,3,2-dioxaborolan-2-yl)hex-3-en-2-ol, 4a** <sup>[7]</sup>

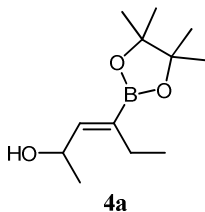

After purification (SiO<sub>2</sub>, hexane/ethyl acetate 7:3) **4a** was isolated as a colorless oil in 90 % yield (0.102 g).

**<sup>1</sup>H NMR (300 MHz, CDCl<sub>3</sub>, 298 K, TMS):**  $\delta$  = 6.20 (d, <sup>3</sup>*J*(H,H) = 8.8 Hz, 1H, CH), 4.76 - 4.64 (m, 1H, CH-OH), 2.18 (q, <sup>3</sup>*J*(H,H) = 7.2 Hz, 2H, CH<sub>2</sub>), 1.28 - 1.26 (m, 15H), 0.98 (t, <sup>3</sup>*J*(H,H) = 7.2 Hz, CH<sub>3</sub>-CH<sub>2</sub>).

**(Z)-2-(1-(4-bromophenyl)hex-1-en-2-yl)-4,4,5,5-Tetramethyl-1,3,2-dioxaborolane, 5a** <sup>[3]</sup>

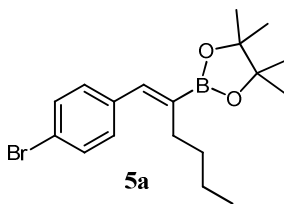

After purification (SiO<sub>2</sub>, hexane/ethyl acetate 20:1) **5a** was isolated as yellowish oil in 93 % yield (0.170 g).

**<sup>1</sup>H NMR (300 MHz, CDCl<sub>3</sub>, 298 K, TMS):**  $\delta$  = 7.45 (d, <sup>3</sup>*J*(H,H) = 8.5 Hz, 2H, CH phenyl), 7.18 (d, <sup>3</sup>*J*(H,H) = 8.5 Hz, 2H, CH phenyl), 7.11 (br. s, 1H, CH), 2.33 (t, <sup>3</sup>*J*(H,H) = 7.0 Hz, 2H, C-CH<sub>2</sub>-CH<sub>2</sub>), 1.51 - 1.26 (m, 16H), 0.88 (t, <sup>3</sup>*J*(H,H) = 7.0 Hz, 3H, CH<sub>3</sub>).

**(Z)-4-methyl-N-(3-phenyl-3-(4,4,5,5-tetramethyl-1,3,2-dioxaborolan-2-yl)allyl)benzene sulfonamide, 6a**

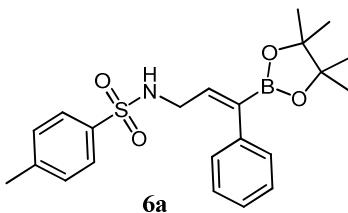

After purification (SiO<sub>2</sub>, hexane/ethyl acetate 8:2) **6a** was isolated as a colorless solid in 90 % yield (0.186 g, mixture of  $\alpha$ - and  $\beta$ -products).

**<sup>1</sup>H NMR (400 MHz, CDCl<sub>3</sub>, 298 K, TMS):** δ = 7.63 (d, <sup>3</sup>J(H,H) = 8.4 Hz, 2H, CH phenyl), 7.36-7.28 (m, 4H, CH phenyl), 7.24-7.18 (m, 5H, CH phenyl), 5.33 (t, <sup>3</sup>J(H,H) = 6.0 Hz, 1H, CH-CH<sub>2</sub>), 3.96 (dd, <sup>3</sup>J(H,H) = 6.0 Hz, <sup>3</sup>J(H,H) = 1.2 Hz, 2H, CH<sub>2</sub>-NH), 2.42 (s, 3H, CH<sub>3</sub>), 1.26 (s, 12H).

**<sup>13</sup>C-{<sup>1</sup>H} NMR (100.6 MHz, CDCl<sub>3</sub>, 298 K, TMS):** δ = 145.8 (s, CH phenyl), 143.2 (s, C<sup>IV</sup> phenyl), 137.2 (s, C<sup>IV</sup> phenyl), 136.2 (s, C<sup>IV</sup> phenyl), 129.6 (s, CH phenyl), 129.2 (s, CH phenyl), 128.5 (s, CH phenyl), 128.3 (s, CH-CH<sub>2</sub>), 127.5 (s, CH phenyl), 84.2 (s, C<sup>IV</sup>-O), 42.9 (s, CH<sub>2</sub>-NH), 24.9 (s, CH<sub>3</sub>-C-O), 21.7 (s, CH<sub>3</sub>, tosyl).

**HRMS calcd. for C<sub>22</sub>H<sub>28</sub>BNO<sub>4</sub>S (M+H)<sup>+</sup>** 413.1942 found 413.1941.

**(Z)-3-(2-(4,4,5,5-tetramethyl-1,3,2-dioxaborolan-2-yl)hex-1-en-2-yl)pyridine, 7a** <sup>[3]</sup>

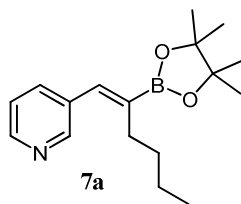

After purification (SiO<sub>2</sub>, hexane/ethyl acetate 6:4) **7a** was isolated as a dark orange oil in 95 % yield (0.151 g).

**<sup>1</sup>H NMR (300 MHz, CDCl<sub>3</sub>, 298 K, TMS):** δ = 8.55 (br. s, 2H, CH Ar), 7.62 (d, <sup>3</sup>J(H,H) = 7.9 Hz, 1H, CH Ar), 7.30 (br. s, 1H, CH Ar), 7.14 (br. s, 1H, CH=C), 2.37-2.30 (m, 2H, CH<sub>2</sub>-C=C), 1.52-1.34 (m, 4H, CH<sub>2</sub>), 1.31 (s, 12H), 1.29-1.25 (m, 2H, CH<sub>2</sub>), 0.88 (t, <sup>3</sup>J(H,H) = 7.2 Hz, 3H, CH<sub>3</sub>-CH<sub>2</sub>).

**(Z)-methyl-4-(2-cyclohexyl-2-(4,4,5,5-tetramethyl-1,3,2-dioxaborolan-2-yl)vinyl)benzoate, 8a** <sup>[3]</sup>

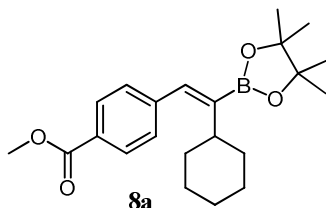

After purification (SiO<sub>2</sub>, hexane/ethyl acetate 8:2) **8a** was isolated as a colorless solid in 92 % yield (0.144 g).

**<sup>1</sup>H NMR (300 MHz, CDCl<sub>3</sub>, 298 K, TMS):**  $\delta$  = 8.00 (d, <sup>3</sup>*J*(H,H) = 8.2 Hz, 2H, *CH* phenyl), 7.31 (d, <sup>3</sup>*J*(H,H) = 8.2 Hz, 2H, *CH* phenyl), 7.13 (s, 1H, *CH*-C phenyl), 3.91 (s, 3H, *CH*<sub>3</sub>), 2.63-2.54 (m, 1H, *CH*<sub>2</sub>-*CH*-*CH*<sub>2</sub>), 1.72-1.62 (m, 5H *CH*<sub>2</sub> cyclohexyl), 1.56-1.49 (m, 2H, *CH*<sub>2</sub> cyclohexyl), 1.31 (s, 12H), 1.27-1.09 (m, 3H, *CH*<sub>2</sub> cyclohexyl).

**(*Z*)- 4,4,5,5-tetramethyl-2-(1-(thiophen-2-yl)hex-1-en-2-yl)-1,3,2-dioxaborolane, 9a** <sup>[3]</sup>

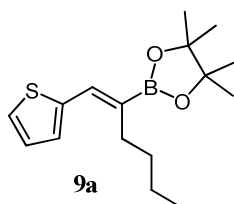

After purification (SiO<sub>2</sub>, hexane/ethyl acetate 15:1) **9a** was isolated as a dark orange oil in 93 % yield (0.136 g).

**<sup>1</sup>H NMR (300 MHz, CDCl<sub>3</sub>, 298 K, TMS):**  $\delta$  = 7.32-7.31 (m, 2H, *CH* Ar and *CH*=C), 7.12 (d, <sup>3</sup>*J*(H,H) = 3.7 Hz, 1H, *CH* Ar), 7.01 (dd, <sup>3</sup>*J*(H,H) = 3.7 Hz, <sup>3</sup>*J*(H,H) = 3.5 Hz, 1H, *CH* Ar), 2.52 (t, <sup>3</sup>*J*(H,H) = 7.7 Hz, 2H, *CH*<sub>2</sub>-C=C), 1.50-1.38 (m, 4H, *CH*<sub>2</sub>), 1.29 (s, 12H), 0.94 (t, <sup>3</sup>*J*(H,H) = 7.7 Hz, 3H, *CH*<sub>3</sub>).

### 3. General procedure for the carboboration of internal alkynes

#### 3.1. General procedure for Table 3.

Catalysts and reagents were stored in air. A vial was charged in air with [Cu(Cl)(IMes)], NaOtBu, bis-(pinacolato)diboron, 1-phenyl-1-butyne **1** (0.5 mmol, 0.071 mL), CPME (1.4 mL) and MeI. The vial was closed with a screw-cap, and the reaction mixture was stirred at 60°C for 24 h. The conversion was determined by GC analysis using an aliquot of the crude mixture. The volatiles were then removed *in vacuo* and the products were purified by column chromatography (SiO<sub>2</sub>). The regioselectivity of the product was determined by <sup>1</sup>H NMR.

**(Z)- 4,4,5,5-tetramethyl-2-(2-(phenylpent-2-en-3-yl)-1,3,2-dioxaborolane, 1b**

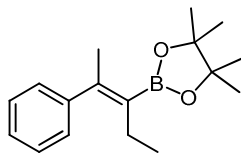

**1b**

After purification (SiO<sub>2</sub>, hexane/ethyl acetate 8:2) **1b** was isolated as a colorless solid in 90 % yield (0.122 g).

**<sup>1</sup>H NMR (400 MHz, CDCl<sub>3</sub>, 298 K, TMS):**  $\delta$  = 7.30 (m, 2H, CH phenyl), 7.24-7.19 (m, 1H, CH phenyl), 7.11 (d, <sup>3</sup>J(H,H) = 7.3 Hz, 2H, CH phenyl), 2.20 (s, 3H, CH<sub>3</sub>-C=C), 1.98 (q, <sup>3</sup>J(H,H) = 7.5 Hz, 2H, CH<sub>2</sub>-CH<sub>3</sub>), 1.33 (s, 12H), 0.89 (t, <sup>3</sup>J(H,H) = 7.5 Hz, 3H, CH<sub>3</sub>-CH<sub>2</sub>).

**<sup>13</sup>C-{<sup>1</sup>H} NMR (100.6 MHz, CDCl<sub>3</sub>, 298 K, TMS):**  $\delta$  = 149.0 (C<sup>IV</sup> phenyl), 144.9 (C<sup>IV</sup>, C=C), 128.1 (CH phenyl), 127.3 (CH phenyl), 126.3 (CH phenyl), 83.2 (C<sup>IV</sup>, C-O-B), 25.7 (CH<sub>2</sub>-CH<sub>3</sub>), 24.9 (CH<sub>3</sub>-C-O), 24.6 (CH<sub>3</sub>-C=C), 15.2 (CH<sub>3</sub>-CH<sub>2</sub>).

**HRMS calcd. for C<sub>17</sub>H<sub>25</sub>BO<sub>2</sub> (M-2H+H)<sup>+</sup>** 270.1904 found 270.1900

**3.2. General procedure for Scheme 4.**

Catalysts and reagents were stored in air. A vial was charged in air with [Cu(Cl)(IMes)] (4.1 mg, 2 mol%), NaO<sup>t</sup>Bu (0.55 mmol, 53 mg, 1.1 equiv.), bis-(pinacolato)diboron (0.65 mmol, 165 mg, 1.3 equiv.), alkyne (0.5 mmol), CPME (1.4 mL) and the electrophile (3-4 equiv.). The vial was closed with a screw-cap, and the reaction mixture was stirred at 60°C for 24 h. The conversion was determined by GC analysis using an aliquot of the crude mixture. The volatiles were then removed *in vacuo* and the products were purified by column chromatography (SiO<sub>2</sub>). The regioselectivity of the product was determined by <sup>1</sup>H NMR.

**(Z)- 4,4,5,5-tetramethyl-2-(3-phenylbut-2-en-3-yl)-1,3,2-dioxaborolane, 2b<sup>[8]</sup>**

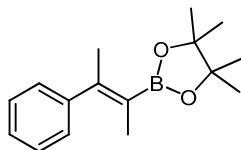

**2b**

After purification (SiO<sub>2</sub>, hexane/ethyl acetate 15:1) **2b** was isolated as a colorless oil in 91 % yield (0.117 g).



**<sup>1</sup>H NMR (300 MHz, CDCl<sub>3</sub>, 298 K, TMS):**  $\delta$  = 7.35-7.30 (m, 2H, CH phenyl), 7.24-7.19 (m, 1H, CH phenyl), 7.13-7.11 (2H, CH phenyl), 2.23 (q, <sup>5</sup>J(H,H) = 1.6 Hz, 3H, CH<sub>3</sub>), 1.59 (q, <sup>5</sup>J(H,H) = 1.6 Hz, CH<sub>3</sub>), 1.33 (s, 12H, CH<sub>3</sub>CO).

**(Z)-trimethyl(2-phenyl-1-(4,4,5,5-tetramethyl-1,3,2-dioxaborolan-2-yl)prop-1-en-1-yl)silane, 3b**

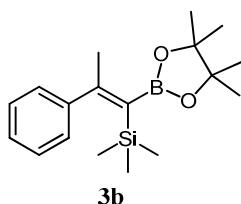

After purification (SiO<sub>2</sub>, gradient pentane/diethyl ether 100:0 to 8:2) **3b** was isolated as a colorless solid in 32 % yield (0.051 g).

**<sup>1</sup>H NMR (300 MHz, CDCl<sub>3</sub>, 298 K):**  $\delta$  = 7.31-7.22 (m, 3H, CH phenyl), 7.17-7.13 (m, 2H, CH phenyl), 2.10 (s, 3H, CH<sub>3</sub>-C=C), 1.30 (s, 12H), -0.16 (s, 9H, CH<sub>3</sub>-Si).

**<sup>13</sup>C-{<sup>1</sup>H} NMR (75 MHz, CDCl<sub>3</sub>, 298 K):**  $\delta$  = 151.8 (s, C<sup>IV</sup> phenyl), 144.1 (s, C=C-Si), 128.5 (s, CH phenyl), 127.8 (s, CH phenyl), 126.1 (s, CH phenyl), 83.6 (s, C<sup>IV</sup>-O), 60.5 (s, C<sup>IV</sup>-Si), 24.8 (s, CH<sub>3</sub>-C-O), 23.2 (s, CH<sub>3</sub>-C=C), -0.13 (s, CH<sub>3</sub>-Si).

**HRMS calcd. for C<sub>18</sub>H<sub>33</sub>BNO<sub>2</sub>Si (M+NH<sub>4</sub>)<sup>+</sup>** 333.2409 found 333.2404.

**(Z)-2-(2-(4-bromophenyl)hept-2-en-3-yl)-4,4,5,5-tetramethyl-1,3,2-dioxaborolane, 5b**

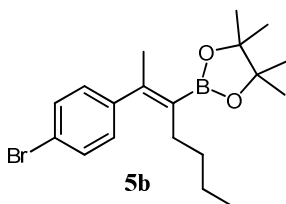

After purification (SiO<sub>2</sub>, pentane/dichloromethane 7:3) **5b** was isolated as a colorless solid in 85 % yield (0.161 g).

**<sup>1</sup>H NMR (300 MHz, CDCl<sub>3</sub>, 298 K, TMS):**  $\delta$  = 7.43 (d, <sup>3</sup>J(H,H) = 8.5 Hz, 2H, CH phenyl), 6.98 (d, <sup>3</sup>J(H,H) = 8.5 Hz, 2H, CH phenyl), 2.15 (s, 3H, CH<sub>3</sub>-C=C), 1.94 (t, <sup>3</sup>J(H,H) = 7.0 Hz, 2H, C=C-CH<sub>2</sub>), 1.33 (s, 12H, CH<sub>3</sub>CO), 1.30-1.12 (m, 4H, CH<sub>2</sub>), 0.77 (t, <sup>3</sup>J(H,H) = 7.0 Hz, 3H, CH<sub>3</sub>-CH<sub>2</sub>).

**$^{13}\text{C}$ - $\{^1\text{H}\}$  NMR (75 MHz,  $\text{CDCl}_3$ , 298 K):**  $\delta$  = 147.2 (s,  $\text{C}^{\text{IV}}$  phenyl), 143.8 (s,  $\text{C}^{\text{IV}}$  phenyl), 131.3 (s, CH phenyl), 129.4 (s, CH phenyl), 120.2 (s,  $\text{C}^{\text{IV}}$  C=C), 83.4 (s,  $\text{C}^{\text{IV}}$ -O), 32.8 (s,  $\text{CH}_2$ ), 32.2 (s,  $\text{CH}_2$ ), 25.1 (s,  $\text{CH}_3$ -C=C), 25.0 (s,  $\text{CH}_3$ -C-O), 22.7 (s,  $\text{CH}_2$ ), 14.1 (s,  $\text{CH}_3$ ).

**HRMS calcd. for  $\text{C}_{19}\text{H}_{28}\text{BBrO}_2$  ( $\text{M}+\text{H}$ ) $^+$**  378.1466 found 378.1475.

***(Z)*-methyl-4-(1-cyclohexyl-1-(4,4,5,5-tetramethyl-1,3,2-dioxaborolan-2-yl)prop-1-en-2-yl)benzoate, 8b**

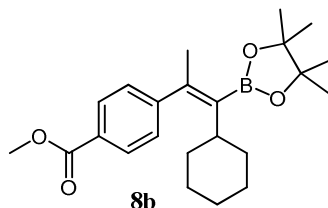

After purification ( $\text{SiO}_2$ , hexane/ethyl acetate 15:1) **8b** was isolated as a colorless solid in 93 % yield (0.152 g).

**$^1\text{H}$  NMR (400 MHz,  $\text{CDCl}_3$ , 298 K, TMS):**  $\delta$  = 7.99 (d,  $^3J(\text{H},\text{H})$  = 8.4 Hz, 2H, CH phenyl), 7.17 (d,  $^3J(\text{H},\text{H})$  = 8.4 Hz, 2H, CH phenyl), 3.91 (s, 3H,  $\text{CH}_3$ -O=CO), 2.07 (s, 3H,  $\text{CH}_3$ -C=C), 1.96-1.90 (m, 1H, CH), 1.72-1.51 (m, 6H,  $\text{CH}_2$ ), 1.37 (s, 12H), 1.28-1.19 (m, 2H,  $\text{CH}_2$ ), 1.06-0.92 (m, 2H,  $\text{CH}_2$ ).

**$^{13}\text{C}$ - $\{^1\text{H}\}$  NMR (100.6 MHz,  $\text{CDCl}_3$ , 298 K):**  $\delta$  = 167.3 (s,  $\text{C}^{\text{IV}}$  carbonyl), 149.9 (s,  $\text{C}^{\text{IV}}$  phenyl), 142.8 (s,  $\text{C}^{\text{IV}}$  phenyl), 129.6 (s, CH phenyl), 129.5 (s, CH phenyl), 128.9 (s, CH phenyl), 128.2 (s,  $\text{C}^{\text{IV}}$  C=C), 127.7 (s, CH phenyl), 83.6 (s,  $\text{C}^{\text{IV}}$ -O), 52.2 (s,  $\text{CH}_3$ -C=O), 42.2 (s, CH-C=C), 32.8 (s,  $\text{CH}_2$ ), 26.4 (s,  $\text{CH}_2$ ), 26.2 (s,  $\text{CH}_2$ ), 25.3 (s,  $\text{CH}_3$ -C-O), 25.2 (s,  $\text{CH}_3$ -C-O), 24.9 (s,  $\text{CH}_3$ -C=C).

**HRMS calcd. for  $\text{C}_{23}\text{H}_{33}\text{BO}_4$  ( $\text{M}+\text{H}$ ) $^+$**  384.2582 found 384.2581.

**(Z)-4,4,5,5-tetramethyl-2-(2-(thiophen-2-yl)hex-2-en-3-yl)-1,3,2-dioxaborolane, 9b**

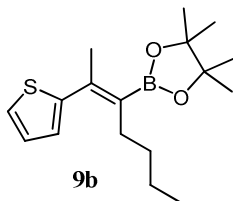

After purification (SiO<sub>2</sub>, hexane/ethyl acetate 40:1) **9b** was isolated as a dark orange oil in 97 % yield (0.148 g).

**<sup>1</sup>H NMR (400 MHz, CDCl<sub>3</sub>, 298 K, TMS):**  $\delta$  = 7.22 (dd, <sup>3</sup>*J*(H,H) = 5.1 Hz, <sup>4</sup>*J*(H,H) = 1.1 Hz, 1H, CH Ar), 6.97 (dd, <sup>3</sup>*J*(H,H) = 3.5 Hz, <sup>3</sup>*J*(H,H) = 5.1 Hz, 1H, CH-CH-S), 6.87 (dd, <sup>3</sup>*J*(H,H) = 3.5 Hz, <sup>4</sup>*J*(H,H) = 1.1 Hz, 1H, CH Ar), 2.27-2.23 (m, 5H, CH<sub>3</sub>-C=C and CH<sub>2</sub>-C=C), 1.32 (s, 12H), 1.29-1.24 (m, 4H, CH<sub>2</sub>), 0.85 (t, <sup>3</sup>*J*(H,H) = 7.0 Hz, 3H, CH<sub>3</sub>-CH<sub>2</sub>).

**<sup>13</sup>C-{<sup>1</sup>H} NMR (100.6 MHz, CDCl<sub>3</sub>, 298 K):**  $\delta$  = 145.5 (s, CH-C<sup>IV</sup>-S), 139.6 (C<sup>IV</sup>-C-S), 126.5 (s, CH=CH-S), 125.1 (s, CH Ar), 124.2 (s, CH Ar), 83.4 (C<sup>IV</sup>-O), 32.8 (s, CH<sub>2</sub>-CH<sub>2</sub>), 32.6 (s, CH<sub>2</sub>), 24.9 (s, CH<sub>3</sub>-C-O), 24.6 (s, CH<sub>3</sub>-C=C), 22.8 (s, CH<sub>2</sub>-CH<sub>3</sub>), 14.1 (s, CH<sub>3</sub>-CH<sub>2</sub>).

**HRMS calcd. for C<sub>17</sub>H<sub>27</sub>BO<sub>2</sub>S (M+H)<sup>+</sup>** 306.1938 found 306.1934.

**(Z)-methyl-4-(1-cyclohexyl-3-phenyl-1-(4,4,5,5-tetramethyl-1,3,2-dioxaborolan-2-yl)prop-1-en-2-yl)benzoate, 8b**

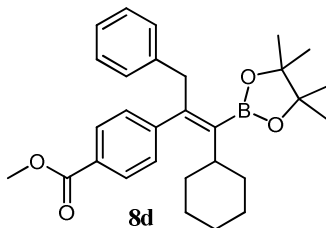

After purification (SiO<sub>2</sub>, hexane/ethyl acetate 15:1) **8b** was isolated as a colorless solid in 93% yield (0.152 g).

**<sup>1</sup>H NMR (300 MHz, CDCl<sub>3</sub>, 298 K, TMS):**  $\delta$  = 7.84 (d, <sup>3</sup>*J*(H,H) = 8.3 Hz, 2H, CH phenyl), 7.17-7.04 (m, 5H, CH phenyl), 6.86 (d, <sup>3</sup>*J*(H,H) = 8.3 Hz, 2H, CH phenyl), 3.86 (s, 3H, CH<sub>3</sub>-OOC), 3.71 (s, 2H, CH<sub>2</sub>-C=C), 1.92-1.82 (m, 1H, CH-C=C), 1.63-1.53 (m, 4H, CH<sub>2</sub>), 1.37 9s, 12H), 1.09-0.87 (m, 4H, CH<sub>2</sub>).

**$^{13}\text{C}$ - $\{^1\text{H}\}$  NMR (75 MHz,  $\text{CDCl}_3$ , 298 K):**  $\delta$  = 167.3 (s,  $\text{C}^{\text{IV}}$  carbonyl), 147.7 (s,  $\text{C}^{\text{IV}}$  phenyl), 146.0 (s,  $\text{C}^{\text{IV}}$  phenyl), 139.2 (s,  $\text{C}^{\text{IV}}$  phenyl), 129.2 (s, CH phenyl), 129.1 (s, CH phenyl), 128.4 (s, CH phenyl), 128.1 (s, CH phenyl), 126.0 (s, CH phenyl), 83.8 (s,  $\text{C}^{\text{IV}}$ -O), 52.0 (s,  $\text{CH}_3\text{-C=O}$ ), 45.2 (s,  $\text{CH}_2\text{-C=C}$ ), 42.3 (s,  $\text{CH-C=C}$ ), 32.8 (s,  $\text{CH}_2$ ), 26.3 (s,  $\text{CH}_2$ ), 26.1 (s,  $\text{CH}_2$ ), 25.1 (s,  $\text{CH}^3\text{-C-O}$ ).

**HRMS calcd. for  $\text{C}_{29}\text{H}_{37}\text{BO}_4$  ( $\text{M}+\text{NH}_4$ ) $^+$**  477.3155 found 477.3159.

***(Z)*-2-(1-cyclopropyl-2-(thiophen-2-yl)hept-2-en-3-yl)-4,4,5,5-tetramethyl-1,3,2-dioxaborolane, 9d**

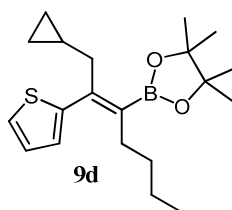

After purification ( $\text{SiO}_2$ , pentane/dichloromethane 6:4) **9d** was isolated as an orange oil in 60 % yield (0.104 g).

**$^1\text{H}$  NMR (300 MHz,  $\text{CDCl}_3$ , 298 K, TMS):**  $\delta$  = 7.23 (dd,  $^3J(\text{H,H})$  = 5.1 Hz,  $^4J(\text{H,H})$  = 1.1 Hz, 1H, CH Ar), 6.98 (dd,  $^3J(\text{H,H})$  = 3.5 Hz,  $^3J(\text{H,H})$  = 5.1 Hz, 1H, CH-CH-S), 6.83 (dd,  $^3J(\text{H,H})$  = 3.5 Hz,  $J(\text{H,H})$  = 1.1 Hz, 1H, CH Ar), 2.48 (d,  $^3J(\text{H,H})$  = 7.0 Hz, 2H, CH- $\text{CH}_2\text{-C=C}$ ), 2.17 (t,  $^3J(\text{H,H})$  = 6.9 Hz, 2H,  $\text{CH}_2\text{-CH}_2\text{-C=C}$ ), 1.35-1.21 (m, 4H,  $\text{CH}_2$ ), 1.30 (s, 12H), 0.82 (t,  $^3J(\text{H,H})$  = 7.4 Hz, 3H,  $\text{CH}_3$ ), 0.76-0.71 (m, 1H, CH- $\text{CH}_2\text{-CH}_2$ ), 0.35-0.30 (m, 2H,  $\text{CH}_2\text{-CH}_2\text{-CH}$ ), 0.10-0.06 (m, 2H,  $\text{CH}_2\text{-CH}_2\text{-CH}$ ).

**$^{13}\text{C}$ - $\{^1\text{H}\}$  NMR (75 MHz,  $\text{CDCl}_3$ , 298 K):**  $\delta$  = 144.2 (s, CH- $\text{C}^{\text{IV}}$ -S), 126.5 (s, CH=CH-S), 125.6 (s, CH Ar), 124.2 (s, CH Ar), 83.4 ( $\text{C}^{\text{IV}}$ -O), 43.6 (s,  $\text{CH}_2\text{-CH-CH}_2$ ), 32.9 (s,  $\text{CH}_2\text{-CH}_2$ ), 32.5 (s,  $\text{CH}_2$ ), 24.9 (s,  $\text{CH}_3\text{-C-O}$ ), 22.8 (s,  $\text{CH}_2\text{-CH}_3$ ), 14.1 (s,  $\text{CH}_3\text{-CH}_2$ ), 10.9 (s, CH- $\text{CH}_2\text{-CH}_2$ ), 4.4 (s,  $\text{CH}_2$ , cyclopropane).

**HRMS calcd. for  $\text{C}_{20}\text{H}_{31}\text{BO}_2\text{S}$  ( $\text{M}+\text{H}$ ) $^+$**  346.2253 found 346.2247.

## 4. General procedure for $\alpha$ -hydroboration of internal alkynes

### 4.1. General procedure for Table 4.

In a glovebox, a vial was charged with the Cu catalyst, the base, 1-phenyl-1-butyne **1** (0.50 mmol, 0.071 mL) and the solvent (0.6 mL). The reaction mixture was stirred for 5 minutes at RT, cooled down to  $-30^{\circ}\text{C}$  and then pinacolborane HB(pin) was added slowly (0.75 mmol, 0.11 mL, 1.5 equiv.). The reaction mixture was allowed to warm up to RT for 20 h under inert atmosphere. The conversion was determined by GC analysis using an aliquot of the crude mixture. The volatiles were then removed *in vacuo* and the products were purified by column chromatography ( $\text{SiO}_2$ ). The regioselectivity and the ( $\alpha$ : $\beta$ ) ratio of the products were determined by  $^1\text{H}$  NMR.

### 4.2. General procedure for Table 5.

Catalysts and reagents were stored in air, with the exception of HB(pin) which was kept under argon to avoid decomposition. A vial was charged in air with  $[\text{Cu}(\text{Cl})(\text{IMes})]$ , NaOH (2.5 mg, 12 mol%), 1-phenyl-1-butyne **1** (0.50 mmol, 0.071 mL) and CPME (0.6 mL). The mixture was stirred for 5 minutes and cooled down to  $-30^{\circ}\text{C}$  and then pinacolborane HB(pin) was added slowly (0.75 mmol, 0.11 mL, 1.5 equiv.). The vial was closed with a screw-cap, and the reaction mixture was stirred at the required temperature for 20 h. The conversion was determined by GC analysis using an aliquot of the crude mixture. The volatiles were then removed *in vacuo* and the products were purified by column chromatography ( $\text{SiO}_2$ ). The regioselectivity and the ( $\alpha$ : $\beta$ ) ratio of the products were determined by  $^1\text{H}$  NMR.

$^1\text{H}$  and  $^{13}\text{C}$ - $\{^1\text{H}\}$  NMR data were found similar to literature values for **1c**.<sup>[5]</sup>

**(Z)- 4,4,5,5-tetramethyl-2-(1-phenylbut-1-en-1-yl)-1,3,2-dioxaborolane, 1c**<sup>[5]</sup>

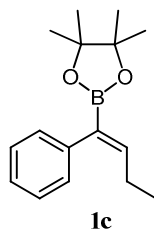

After purification ( $\text{SiO}_2$ , hexane/ethyl acetate 20:1) **1c** was isolated as a yellowish oil in 94 % yield (0.121 g).

**<sup>1</sup>H NMR (300 MHz, CDCl<sub>3</sub>, 298 K, TMS):**  $\delta$  = 7.33-7.28 (m, 2H, CH phenyl), 7.22-7.12 (m, 3H, CH phenyl), 6.57 (t, <sup>3</sup>*J*(H,H) = 7.3 Hz, 1H, CH-CH<sub>2</sub>), 2.17 (q, <sup>3</sup>*J*(H,H) = 7.3 Hz, 2H, CH-CH<sub>2</sub>-CH<sub>3</sub>), 1.27 (s, 12H), 1.00 (t, <sup>3</sup>*J*(H,H) = 7.3 Hz, 3H, CH<sub>3</sub>-CH<sub>2</sub>).

#### 4.3. General procedure for Scheme 6.

Catalysts and reagents were stored in air, with the exception of HB(pin) which was kept under argon to avoid decomposition. A vial was charged in air with [Cu(Cl)(IMes)], NaOH (2.5 mg, 12 mol%), alkyne (0.50 mmol) and CPME (0.6 mL). The mixture was stirred for 5 minutes, cooled down to -30°C and then pinacolborane HB(pin) was added slowly (0.75 mmol, 0.11 mL, 1.5 equiv.). The vial was closed with a screw-cap and the reaction mixture was stirred at 80°C for 20 h. The conversion was determined by GC analysis using an aliquot of the crude mixture. The volatiles were then removed *in vacuo* and the products were purified by column chromatography (SiO<sub>2</sub>). The regioselectivity and the ( $\alpha$ : $\beta$ ) ratio of the products were determined by <sup>1</sup>H NMR.

<sup>1</sup>H and <sup>13</sup>C-<sup>1</sup>H NMR data were found similar to literature values for **2c**,<sup>[3]</sup> **3c**,<sup>[3]</sup> **5c**,<sup>[3]</sup> **7c**,<sup>[3]</sup> **8c**,<sup>[3]</sup> and **9c**.<sup>[3]</sup>

**(Z)- 4,4,5,5-tetramethyl-2-(1-phenylprop-1-en-1-yl)-1,3,2-dioxaborolane, 2c**<sup>[3]</sup>

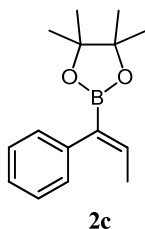

After purification (SiO<sub>2</sub>, hexane/ethyl acetate 30:1) **2c** was isolated as a yellowish oil in 70 % yield (0.085 g).

**<sup>1</sup>H NMR (300 MHz, CDCl<sub>3</sub>, 298 K, TMS):**  $\delta$  = 7.34-7.29 (m, 2H, CH phenyl), 7.22-7.14 (m, 3H, CH phenyl), 6.72 (q, <sup>3</sup>*J*(H,H) = 6.9 Hz, 1H, CH-CH<sub>3</sub>), 1.77 (d, <sup>3</sup>*J*(H,H) = 6.9 Hz, 3H, CH<sub>3</sub>-CH), 1.27 (s, 12H).

*(Z)*-trimethyl(2-phenyl-2-(4,4,5,5-tetramethyl-1,3,2-dioxaborolan-2-yl)vinyl)silane, **3c**<sup>[3]</sup>

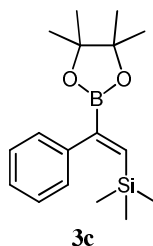

After purification (SiO<sub>2</sub>, hexane/ethyl acetate 40:1) **3c** was isolated as a colorless solid in 87% yield (0.132 g).

**<sup>1</sup>H NMR (300 MHz, CDCl<sub>3</sub>, 298 K, TMS):**  $\delta$  = 8.01 (s, 1H, CH-Si), 7.29-7.27 (m, 3H, CH phenyl), 7.26-7.23 (m, 2H, CH phenyl), 1.30 (s, 12H), 0.00 (s, (9H, Si-CH<sub>3</sub>)).

*(Z)*-4,4,5,5-tetramethyl-2-(1-phenylhex-1-en-1-yl)-1,3,2-dioxaborolane, **5c**<sup>[3]</sup>

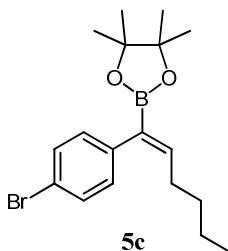

After purification (SiO<sub>2</sub>, hexane/ethyl acetate 30:1) **5c** was isolated as a yellowish oil in 91% yield (0.166 g).

**<sup>1</sup>H NMR (300 MHz, CDCl<sub>3</sub>, 298 K, TMS):**  $\delta$  = 7.42 (d, <sup>3</sup>*J*(H,H) = 8.6 Hz, 2H, CH phenyl), 7.00 (d, <sup>3</sup>*J*(H,H) = 8.6 Hz, 2H, CH phenyl), 6.59 (t, <sup>3</sup>*J*(H,H) = 7.5 Hz, 1H, CH-CH<sub>2</sub>), 2.17-2.05 (m, 2H, CH<sub>2</sub>), 1.40-1.19 (m, 4H, CH<sub>2</sub>), 1.26 (s, 12H), 0.83 (t, <sup>3</sup>*J*(H,H) = 7.1 Hz, 3H, CH<sub>3</sub>-CH<sub>2</sub>).

***(Z)*-4-methyl-N-(2-(4,4,5,5-tetramethyl-1,3,2-dioxaborolan-2-yl)-3-(trimethylsilyl)allyl)benzenesulfonamide, 6c**

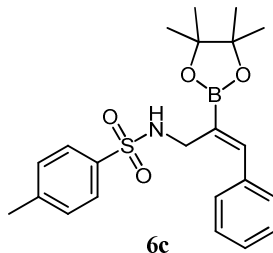

Following the procedure described in 4.2, compounds **6c** and **6a** were obtained as a mixture 75:25 as a yellowish solid after purification (SiO<sub>2</sub>, dichloromethane/diethylether 20:1) in 65 % yield (0.134 g).

**<sup>1</sup>H NMR (300 MHz, CDCl<sub>3</sub>, 298 K, TMS)** of **6a**:  $\delta$  = 7.63 (d,  $^3J(\text{H,H})$  = 8.4 Hz, 2H, CH phenyl), 7.36-7.28 (m, 4H, CH phenyl), 7.24-7.18 (m, 5H, CH phenyl), 5.33 (t,  $^3J(\text{H,H})$  = 6.0 Hz, 1H, CH-CH<sub>2</sub>), 3.96 (dd,  $^3J(\text{H,H})$  = 6.0 Hz,  $^3J(\text{H,H})$  = 1.2 Hz, 2H, CH<sub>2</sub>-NH), 2.42 (s, 3H, CH<sub>3</sub>), 1.26 (s, 12H).

**<sup>1</sup>H NMR (300 MHz, CDCl<sub>3</sub>, 298 K, TMS)** of **6c**:  $\delta$  = 7.81 (d,  $^3J(\text{H,H})$  = 8.6 Hz, 2H, CH phenyl), 7.72 (d,  $^3J(\text{H,H})$  = 8.6 Hz, 2H, CH phenyl), 7.68-7.66 (m, 1H, CH phenyl), 7.09 (d,  $^3J(\text{H,H})$  = 7.5 Hz, 2H, CH phenyl), 7.00 (d,  $^3J(\text{H,H})$  = 7.5 Hz, 2H, CH phenyl), 5.60-5.52 (m, 1H, CH=C-B), 4.78 (broad m, 1H, NH), 3.88-3.83 (m, 2H, CH<sub>2</sub>-NH), 2.43 (s, 3H, CH<sub>3</sub> tosyl), 1.24 (s, 12H).

**HRMS calcd. for C<sub>22</sub>H<sub>28</sub>BNO<sub>4</sub>S (M+H)<sup>+</sup>** 413.1936 found 413.1941.

***(Z)*-3-(1-(4,4,5,5-tetramethyl-1,3,2-dioxaborolan-2-yl)hex-1-en-1-yl)pyridine, 7c<sup>[3]</sup>**

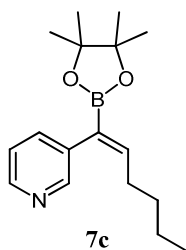

After purification (SiO<sub>2</sub>, hexane/ethyl acetate 7:3) **7c** was isolated as a dark brown oil in 99 % yield (0.142 g).



**<sup>1</sup>H NMR (300 MHz, CDCl<sub>3</sub>, 298 K, TMS):**  $\delta$  = 8.43 (br. s, 2H, CH Ar), 7.48 (d, <sup>3</sup>*J*(H,H) = 7.5 Hz, 1H, CH Ar), 7.26 (br. s, 1H, CH Ar), 6.69 (t, <sup>3</sup>*J*(H,H) = 7.5 Hz, 1H, CH-CH<sub>2</sub>), 2.14 (q, <sup>3</sup>*J*(H,H) = 7.4 Hz, 2H, CH<sub>2</sub>-CH<sub>3</sub>), 1.46-1.32 (m, 4H, CH<sub>2</sub>), 1.24 (s, 12H), 0.83 (t, <sup>3</sup>*J*(H,H) = 7.4 Hz, 3H, CH<sub>3</sub>-CH<sub>2</sub>).

**(Z)-methyl-4-(2-cyclohexyl-1-(4,4,5,5-tetramethyl-1,3,2-dioxaborolan-2-yl)vinyl)benzoate, 8c**<sup>[3]</sup>

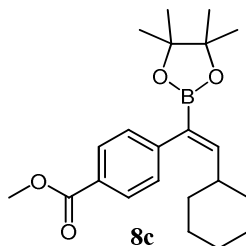

After purification (SiO<sub>2</sub>, hexane/ethyl acetate 15:1) **8c** was isolated as a colorless solid in 99 % yield (0.184 g).

**<sup>1</sup>H NMR (300 MHz, CDCl<sub>3</sub>, 298 K, TMS):**  $\delta$  = 7.98 (d, <sup>3</sup>*J*(H,H) = 8.2 Hz, 2H, CH phenyl), 7.18 (d, <sup>3</sup>*J*(H,H) = 8.2 Hz, 2H, CH phenyl), 6.40 (d, <sup>3</sup>*J*(H,H) = 10.4 Hz, 1H, CH=C-B), 3.91 (s, 3H, CH<sub>3</sub>-O-CO), 2.29 - 2.16 (m, 1H, CH-CH=C), 1.67 - 1.57 (m, 4H, CH<sub>2</sub>), 1.26 (s, 12H), 1.18 - 1.10 (m, 6H, CH<sub>2</sub>).

**(Z)- 4,4,5,5-tetramethyl-2-(1-thiophen-2-yl)-hex-1-en-1-yl)-1,3,2-dioxaborolane, 9c**<sup>[3]</sup>

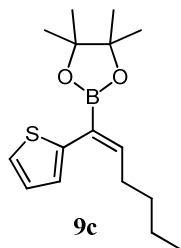

After purification (SiO<sub>2</sub>, hexane/ethyl acetate 20:1) **9c** was isolated as a dark orange oil in 78% yield (0.114 g).

**<sup>1</sup>H NMR (300 MHz, CDCl<sub>3</sub>, 298 K, TMS):**  $\delta$  = 7.24 (dd, <sup>3</sup>*J*(H,H) = 5.1 Hz, <sup>4</sup>*J*(H,H) = 1.1 Hz, 1H, CH-S ), 7.13 (dd, <sup>3</sup>*J*(H,H) = 3.5 Hz, <sup>4</sup>*J*(H,H) = 1.1 Hz, 1H, CH-C-S), 7.01 (dd, <sup>3</sup>*J*(H,H) = 5.1 Hz, <sup>3</sup>*J*(H,H) = 3.5 Hz, 1H, CH-CH-S), 6.55 (t, <sup>3</sup>*J*(H,H) = 7.1 Hz, 1H, CH=C-

B), 2.46-2.39 (m, 2H,  $\text{CH}_2\text{-CH=C}$ ), 1.54-1.32 (m, 4H,  $\text{CH}_2$ ), 1.30 (s, 12H), 0.90 (t,  $^3J(\text{H,H}) = 7.2 \text{ Hz}$ , 3H,  $\text{CH}_3$ ).

## 5. $^1\text{H}$ and $^{13}\text{C}\{-^1\text{H}\}$ NMR spectra

$^1\text{H}$  and  $^{13}\text{C}\{-^1\text{H}\}$  NMR spectra of products 1a-9a

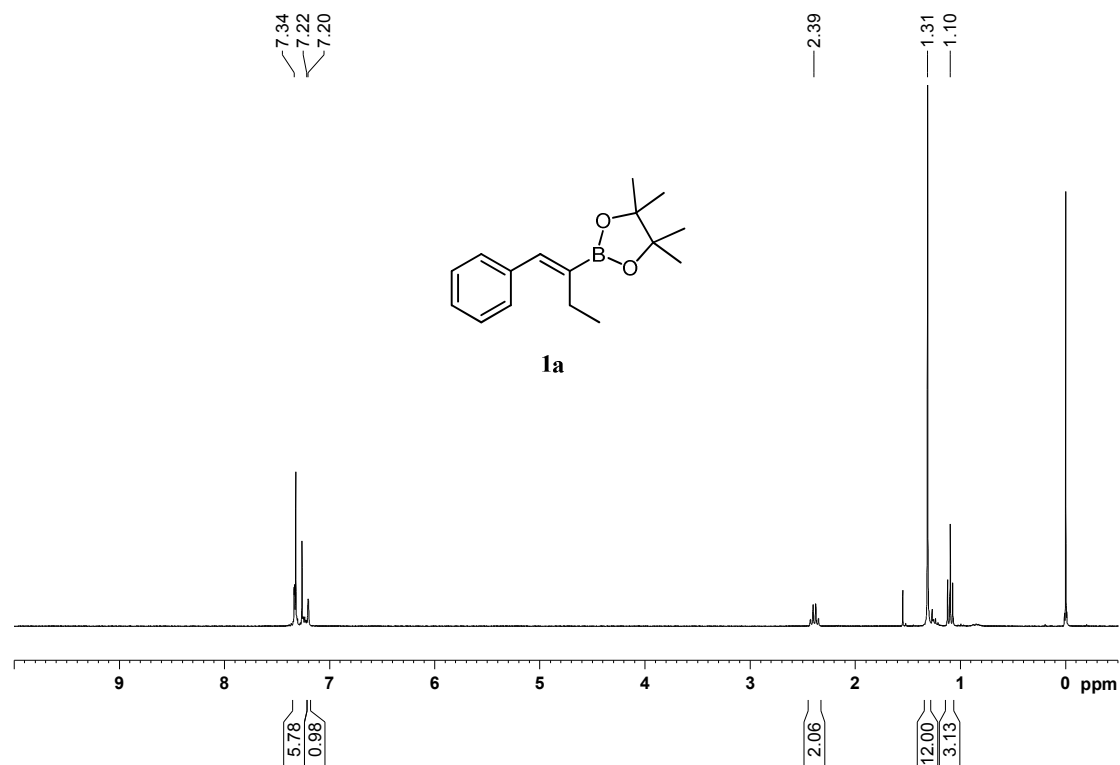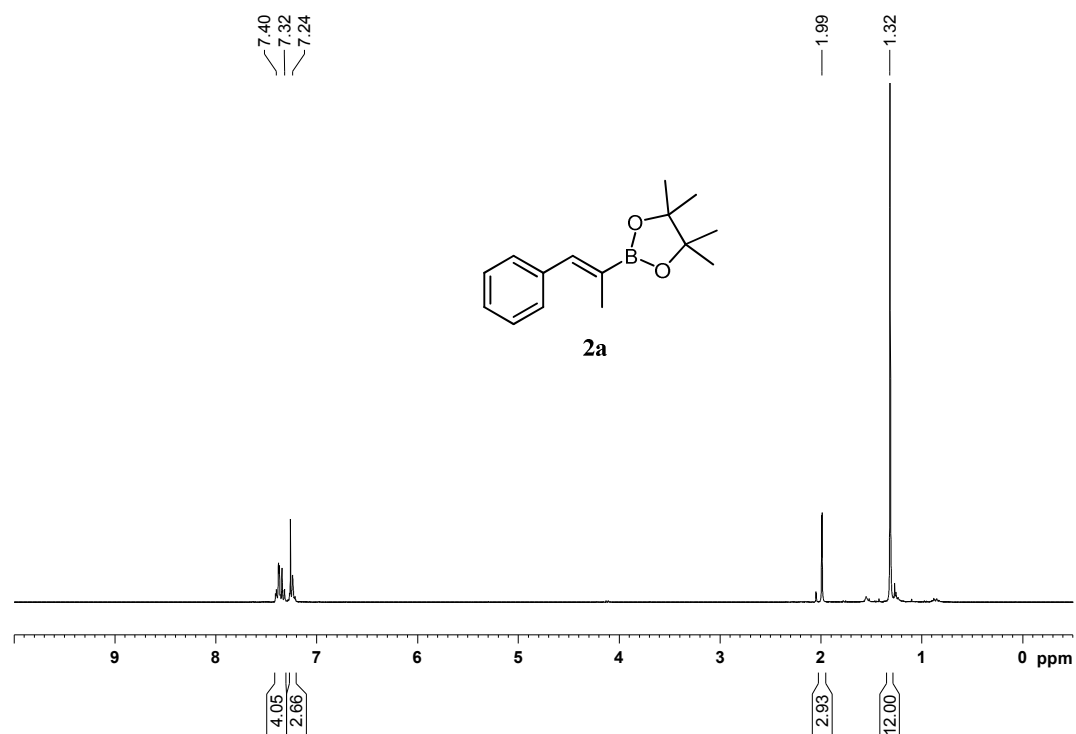

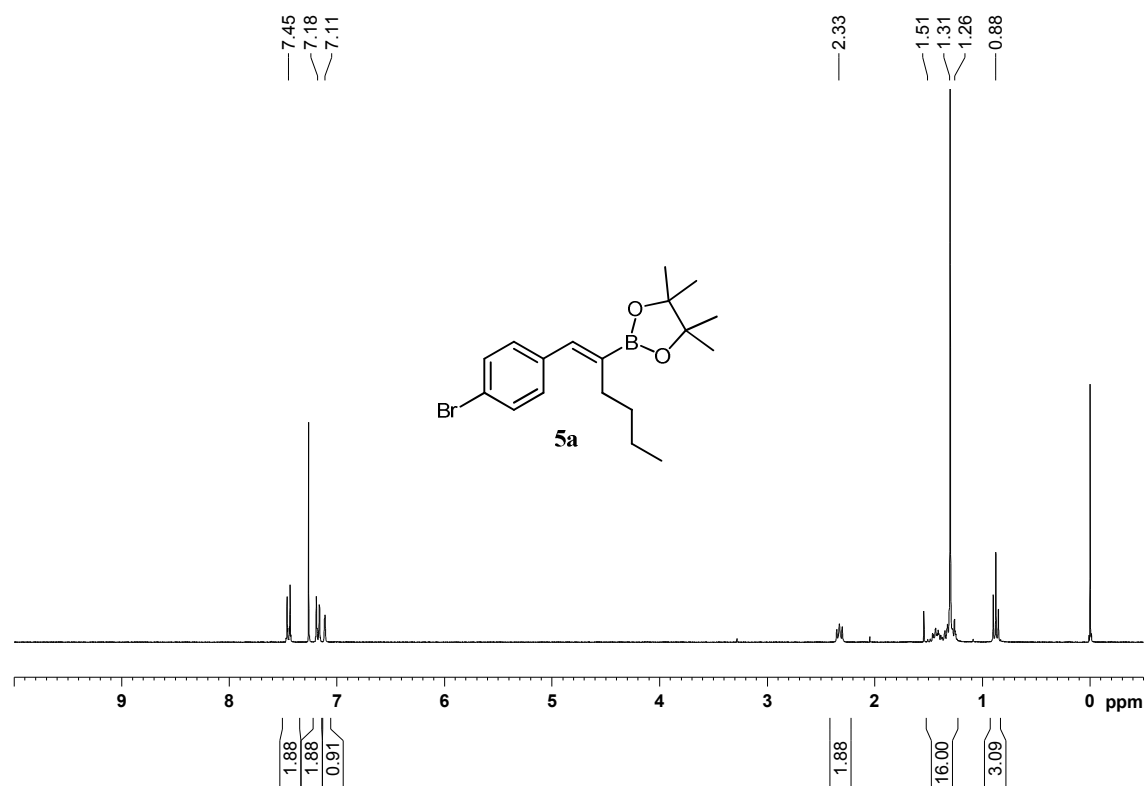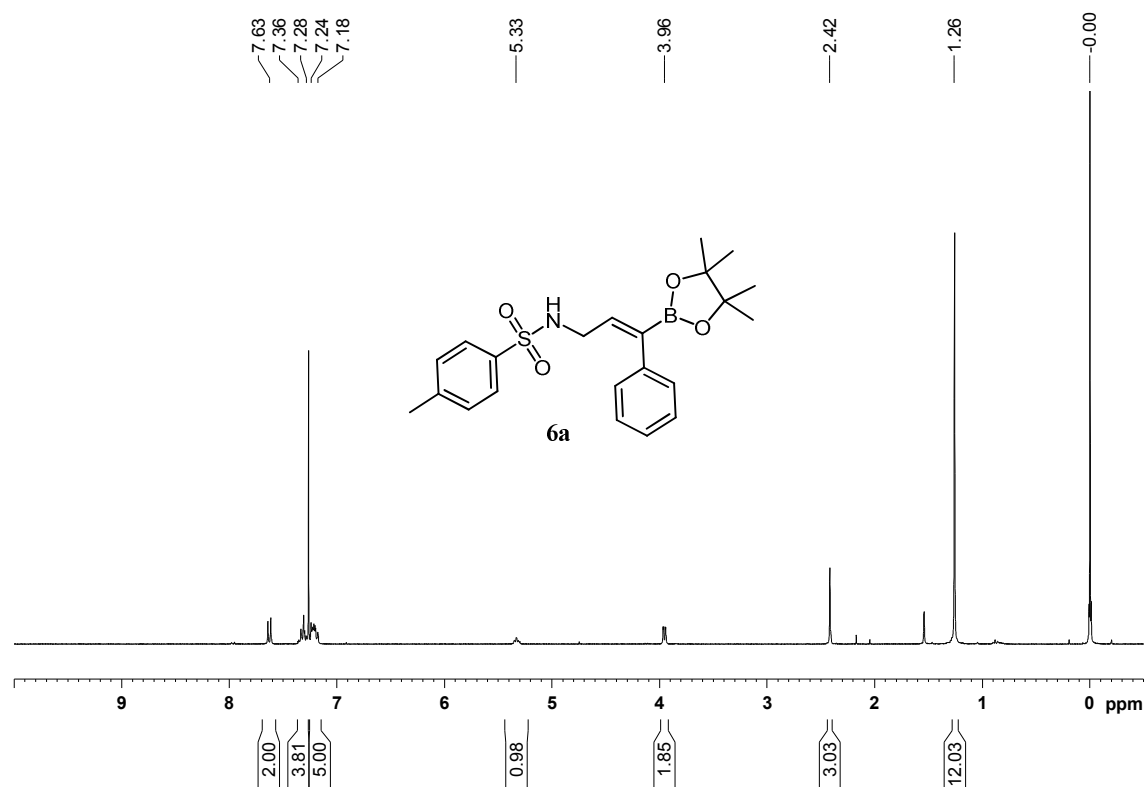

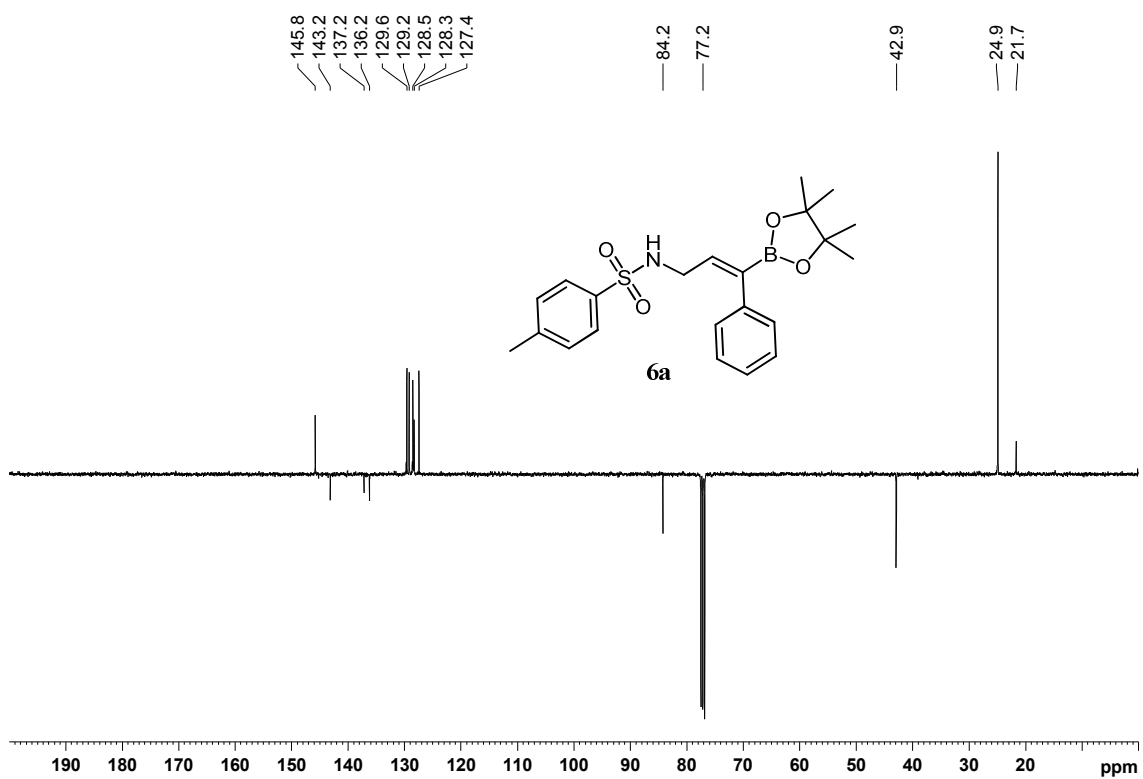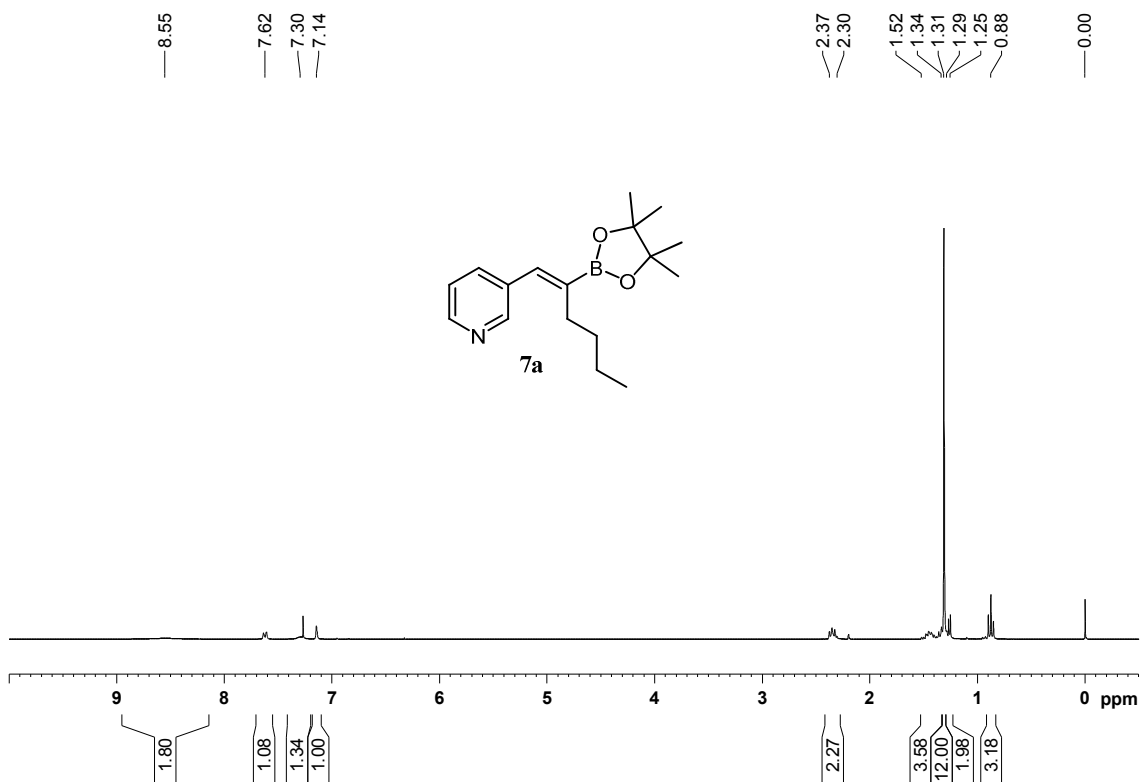

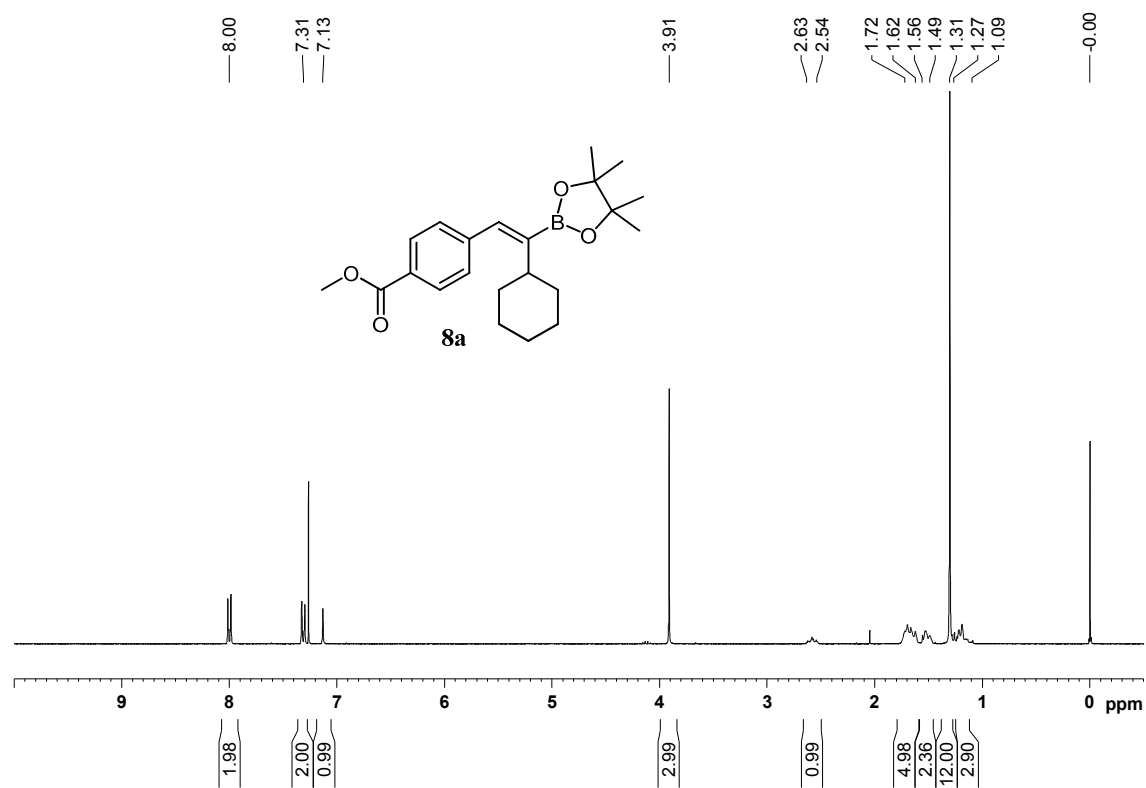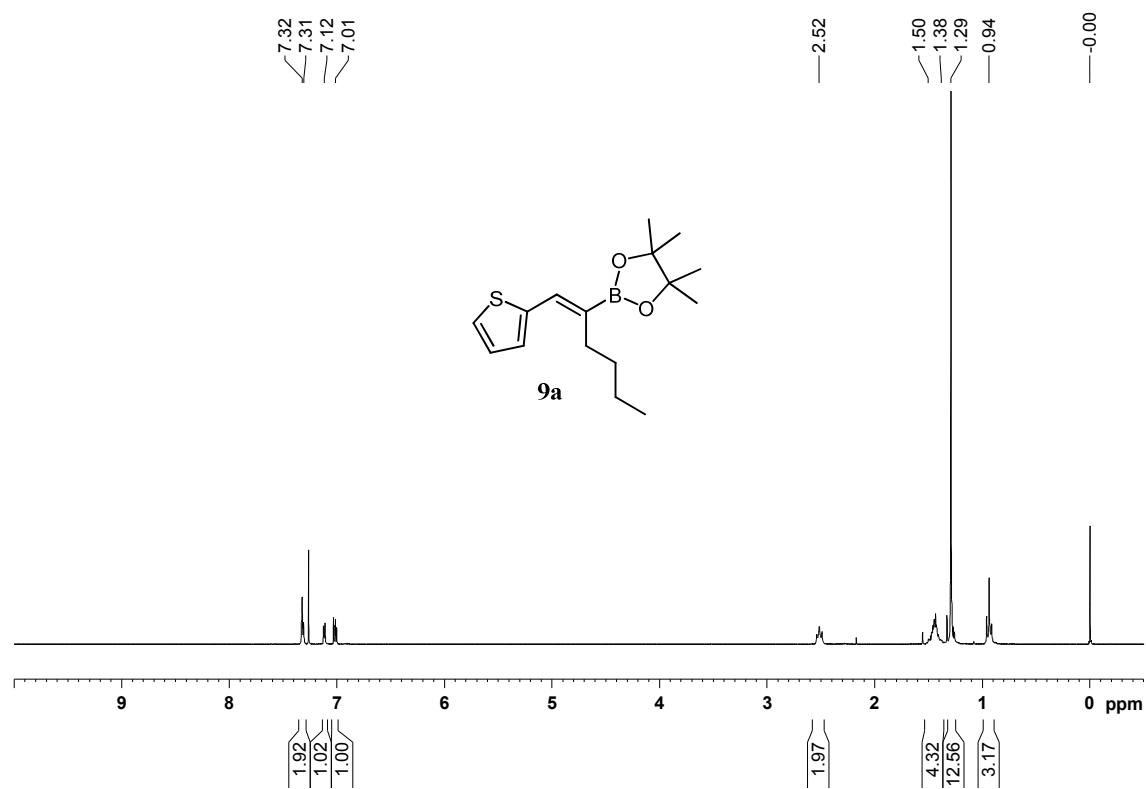

The figure displays the chemical structure of compound **1b** and its corresponding <sup>1</sup>H and <sup>13</sup>C NMR spectra.

**Chemical Structure of 1b:** CC(C)(C1OC(C)(C)OC1C=C(C)C2=CC=CC=C2)

**<sup>1</sup>H NMR Spectrum (400 MHz, CDCl<sub>3</sub>):**

- Chemical shift range: 0 to 10 ppm.
- Peak labels (ppm): 7.30, 7.24, 7.19, 7.11, 2.20, 1.98, 1.33, 0.89, -0.00.
- Integration values: 2.14, 1.13, 1.99, 3.00, 2.02, 11.92, 3.09.

**<sup>13</sup>C NMR Spectrum (100 MHz, CDCl<sub>3</sub>):**

- Chemical shift range: 0 to 200 ppm.
- Peak labels (ppm): 149.0, 144.9, 128.1, 127.3, 126.3, 83.2, 25.7, 24.9, 24.6, 15.2.

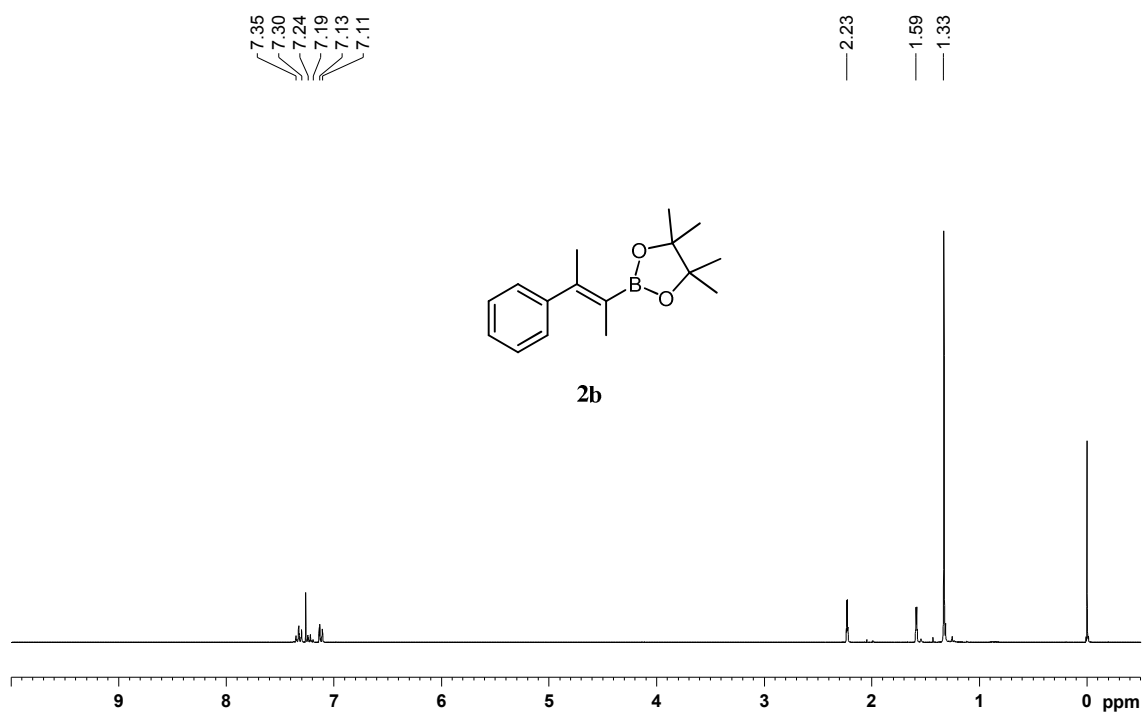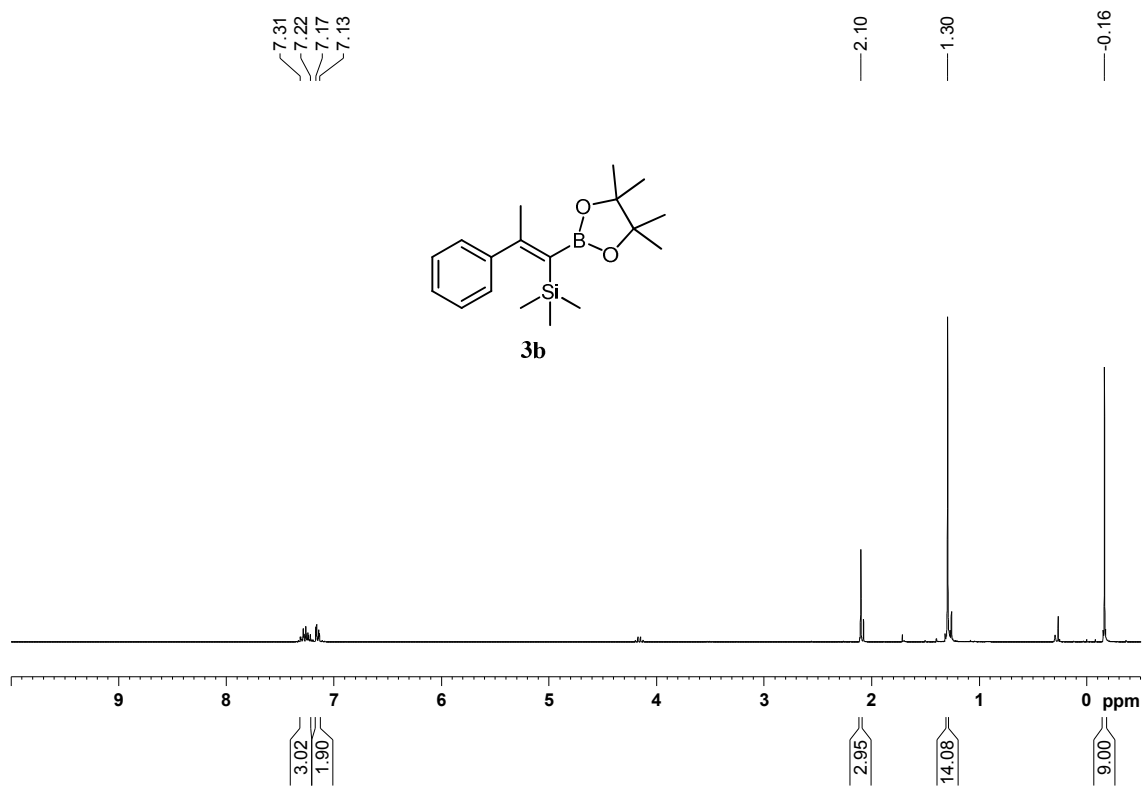



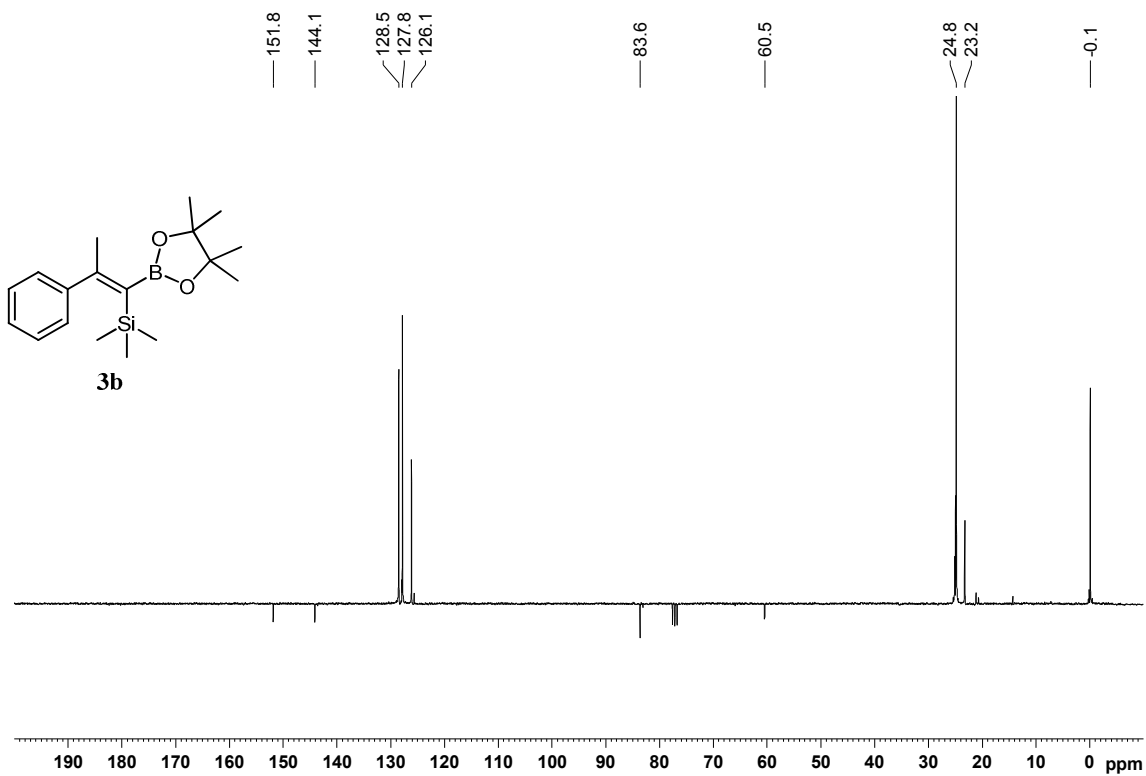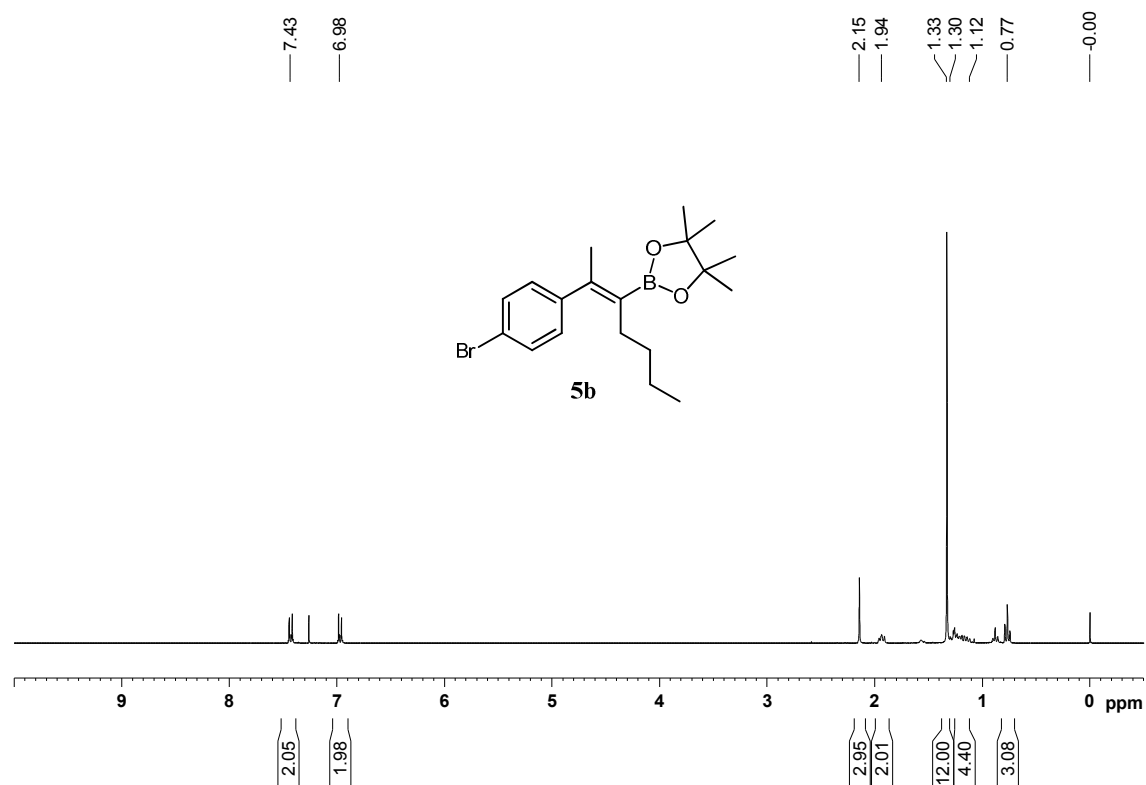

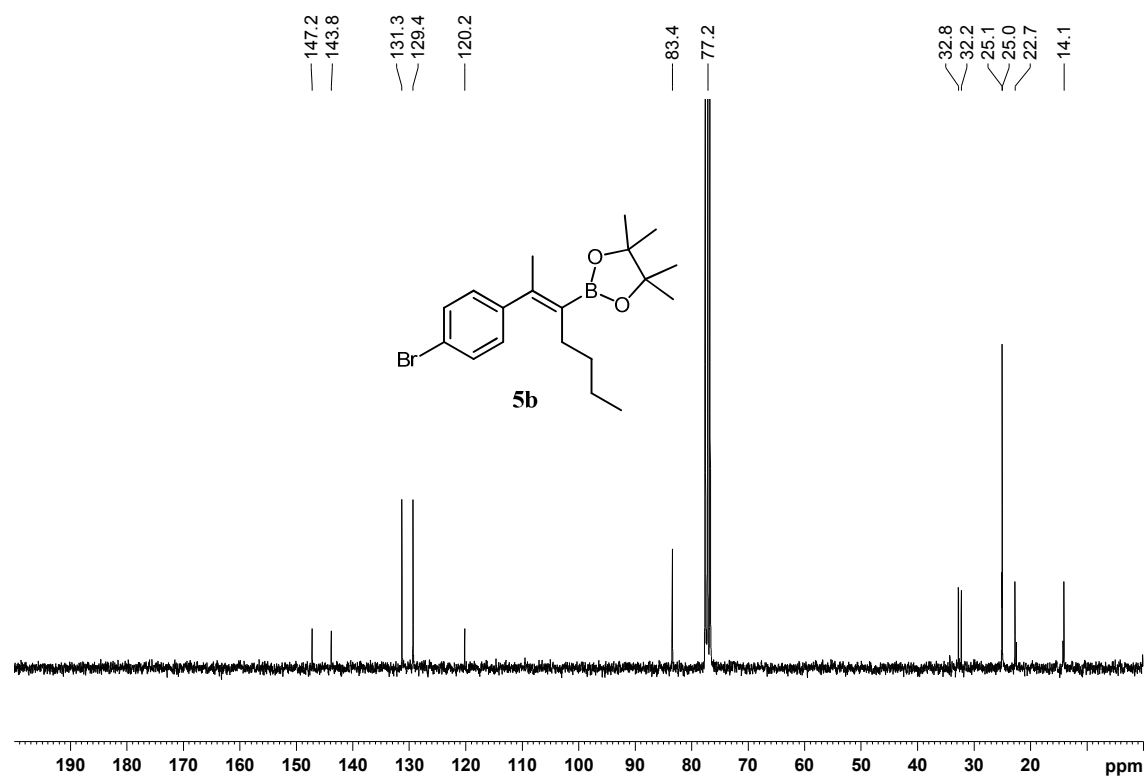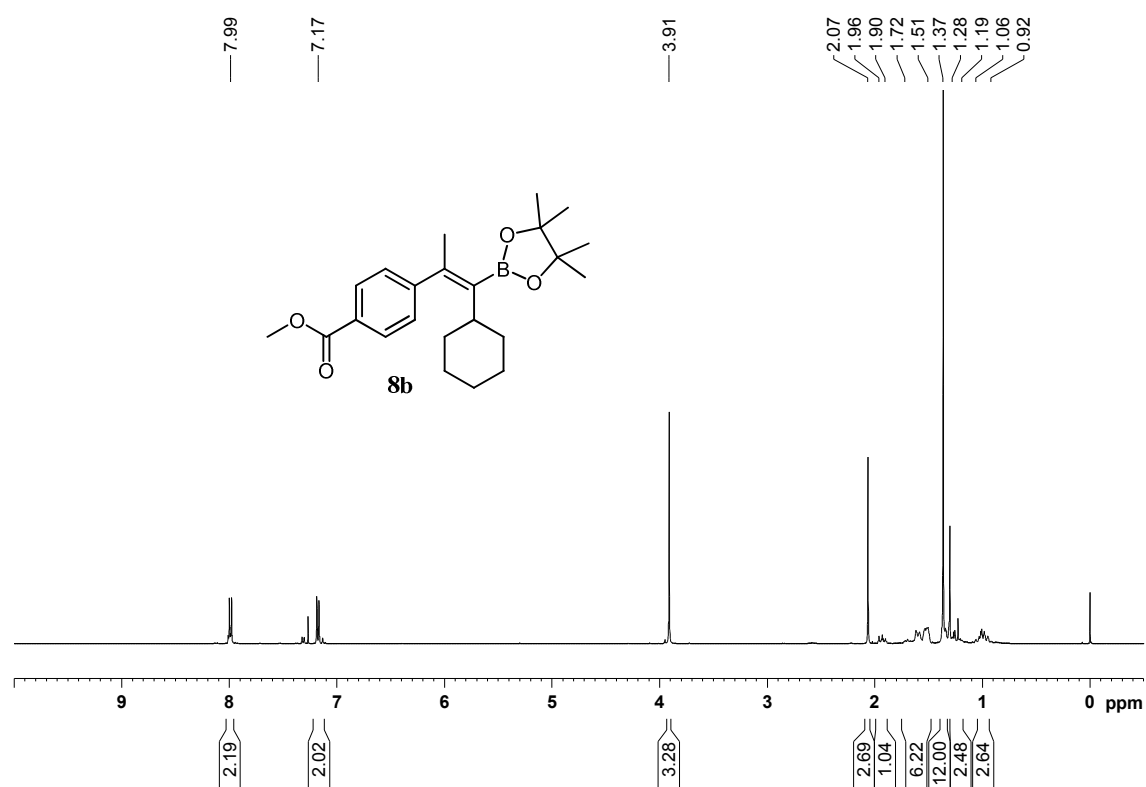

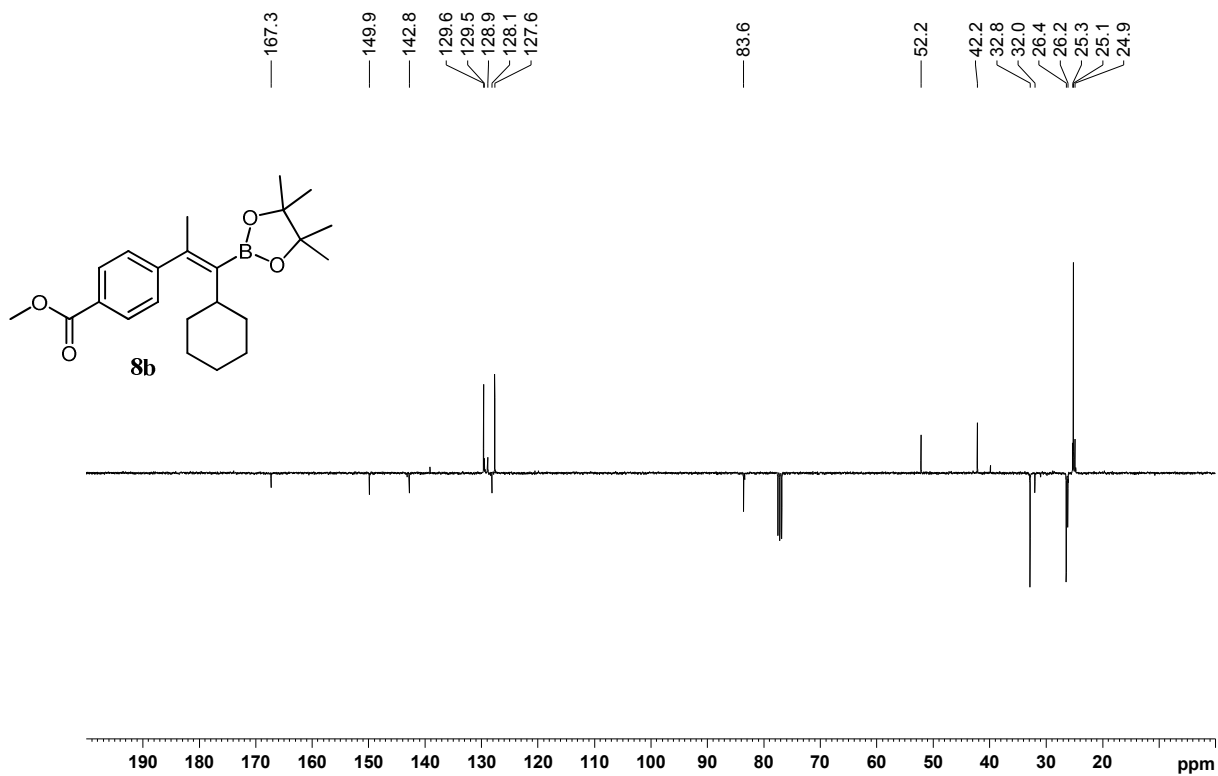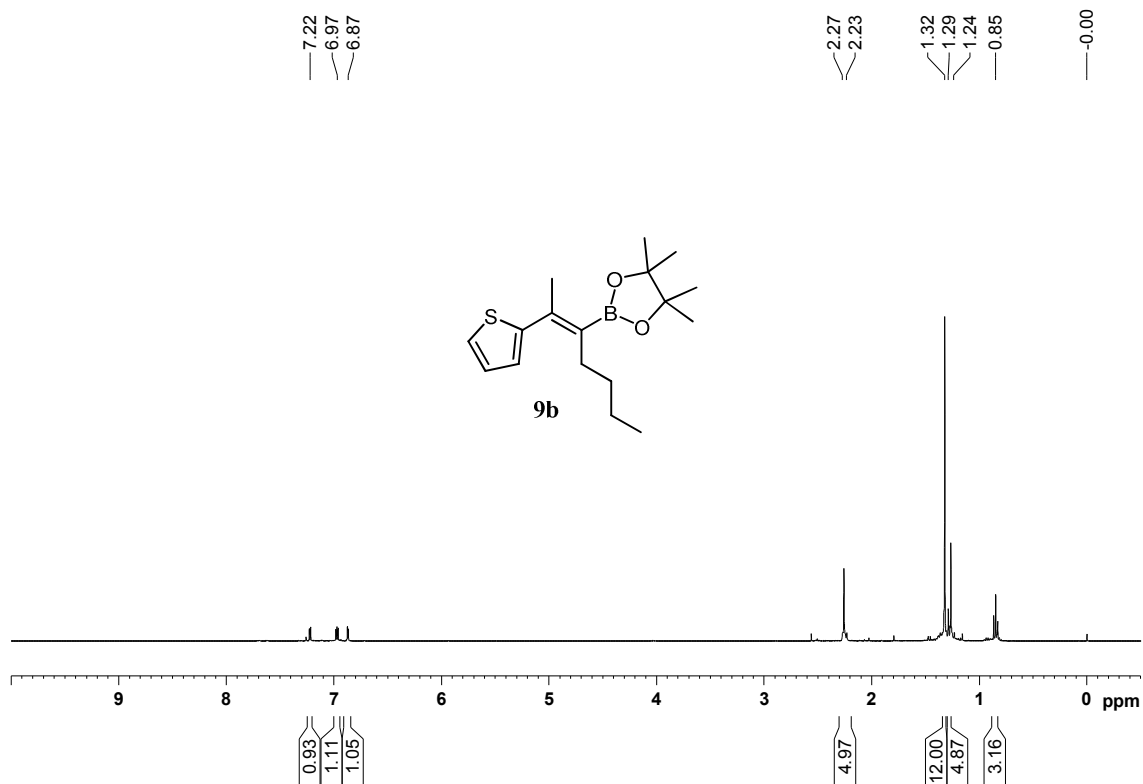

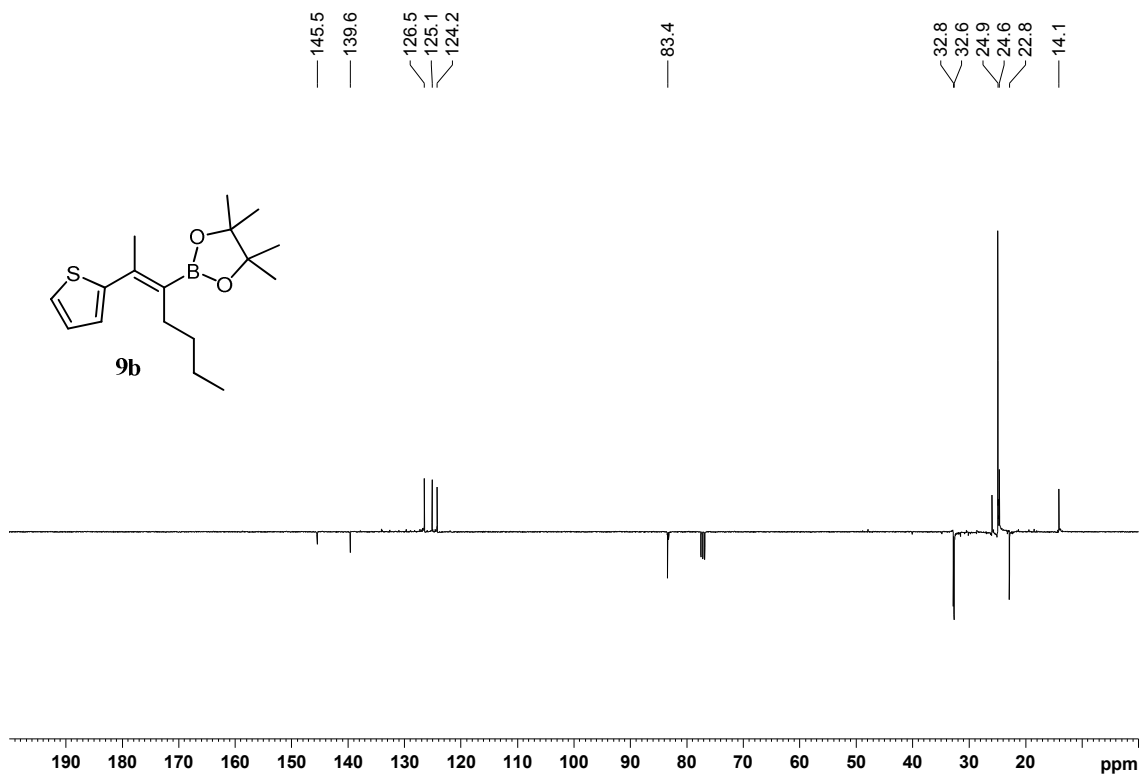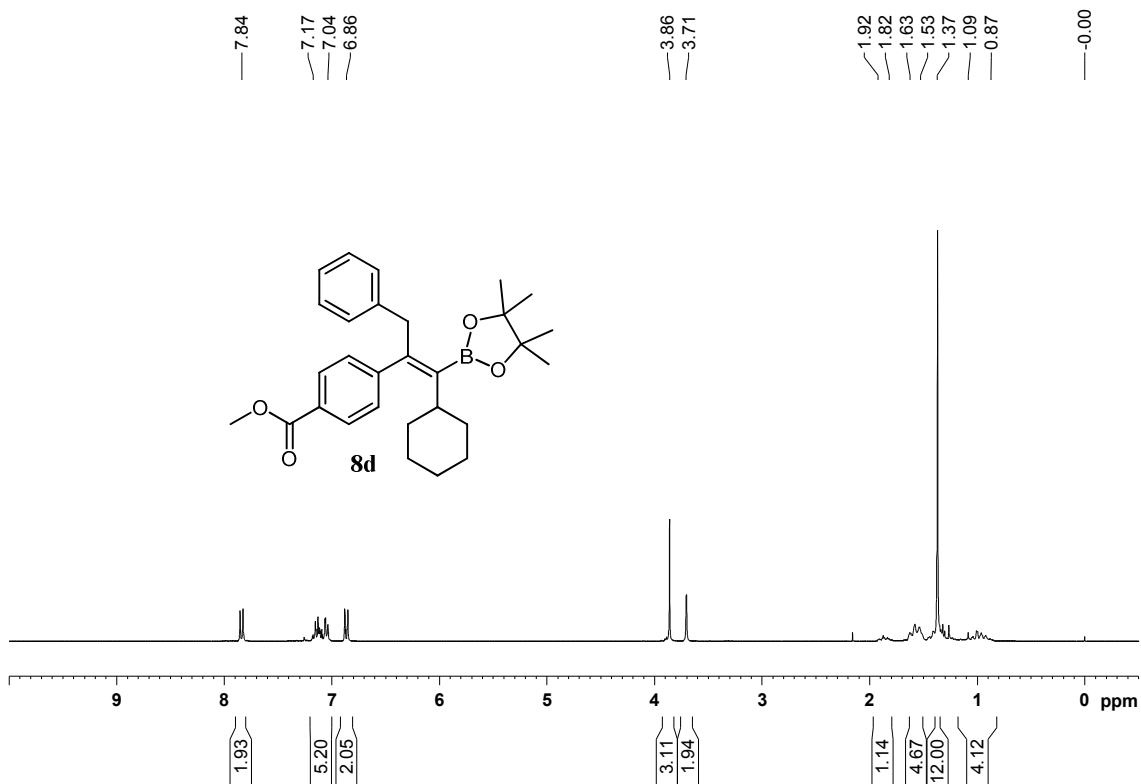

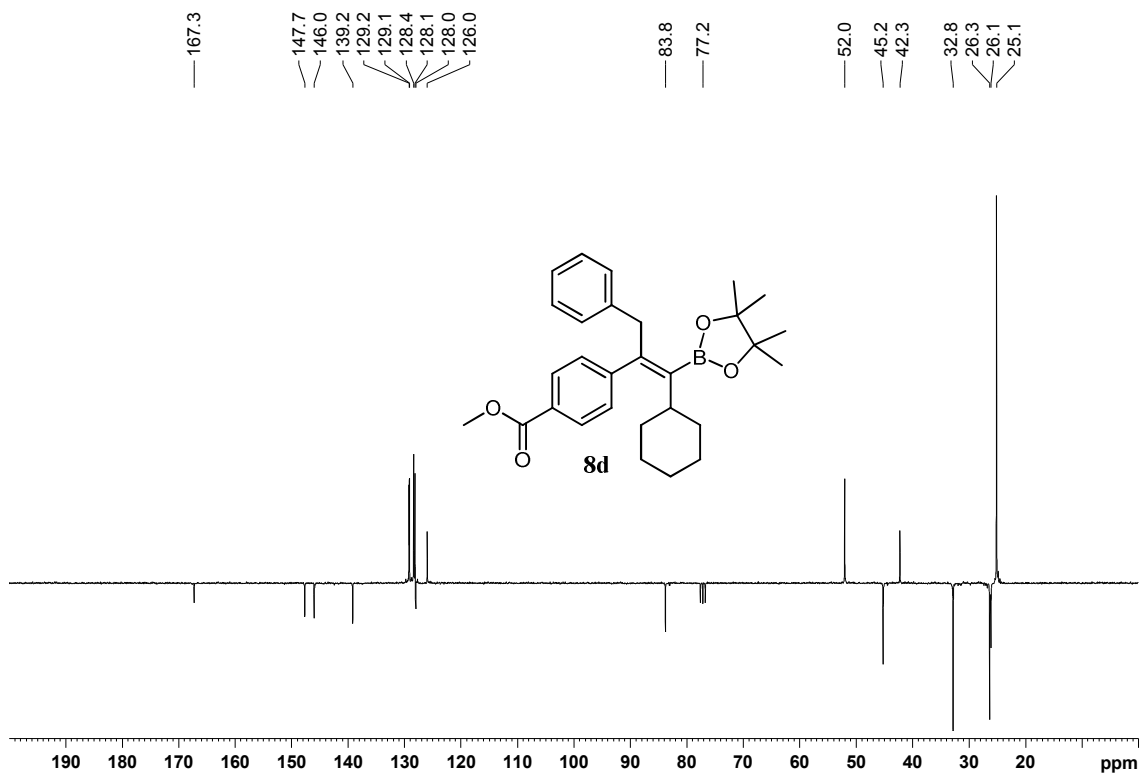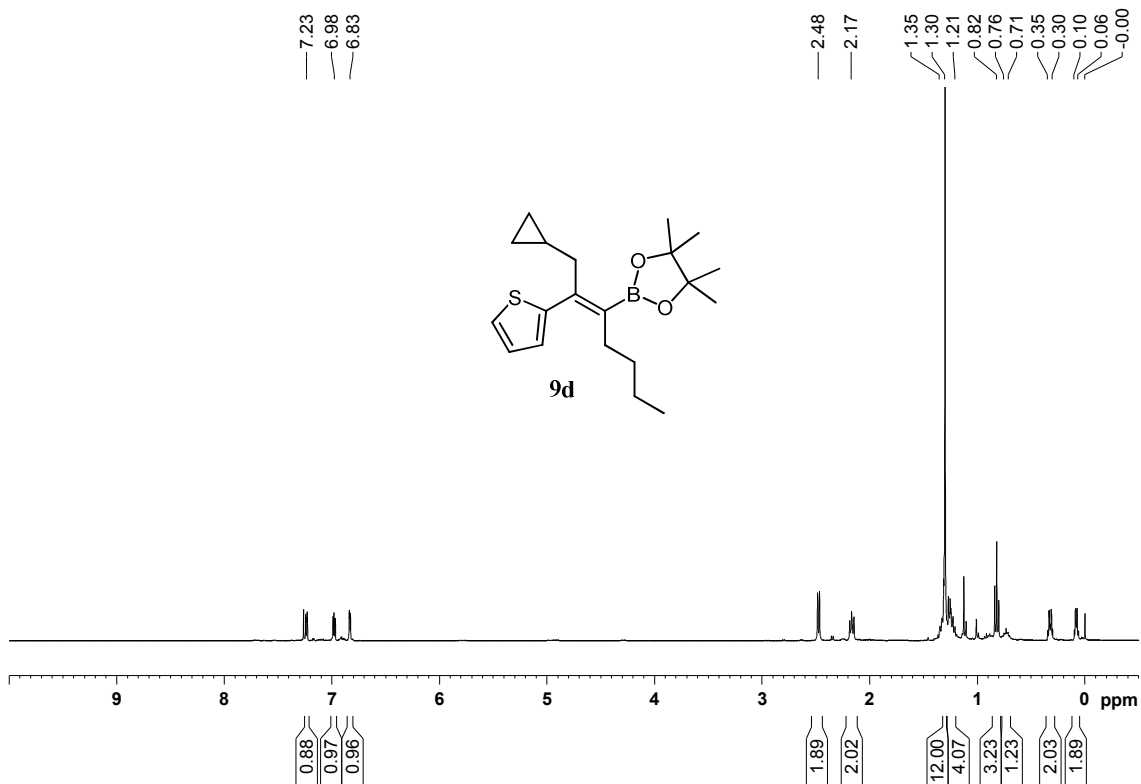

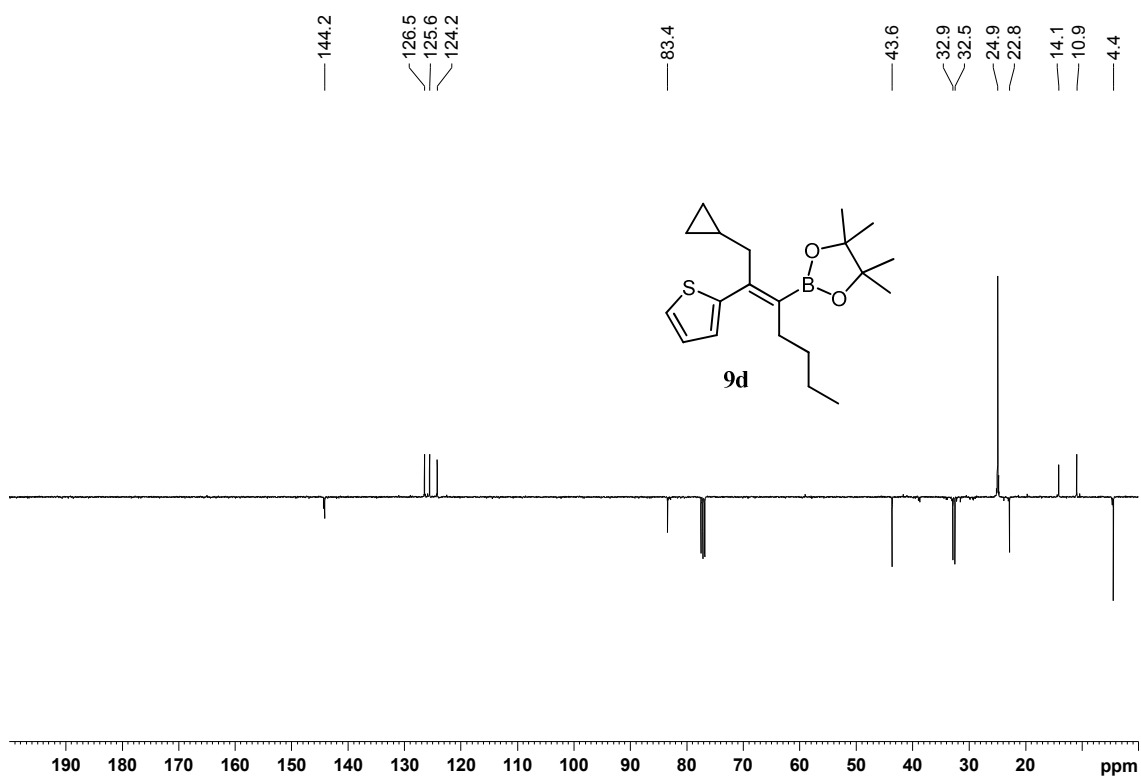

$^1\text{H}$  and  $^{13}\text{C}\{-^1\text{H}\}$  NMR spectra of products **1c-9c**

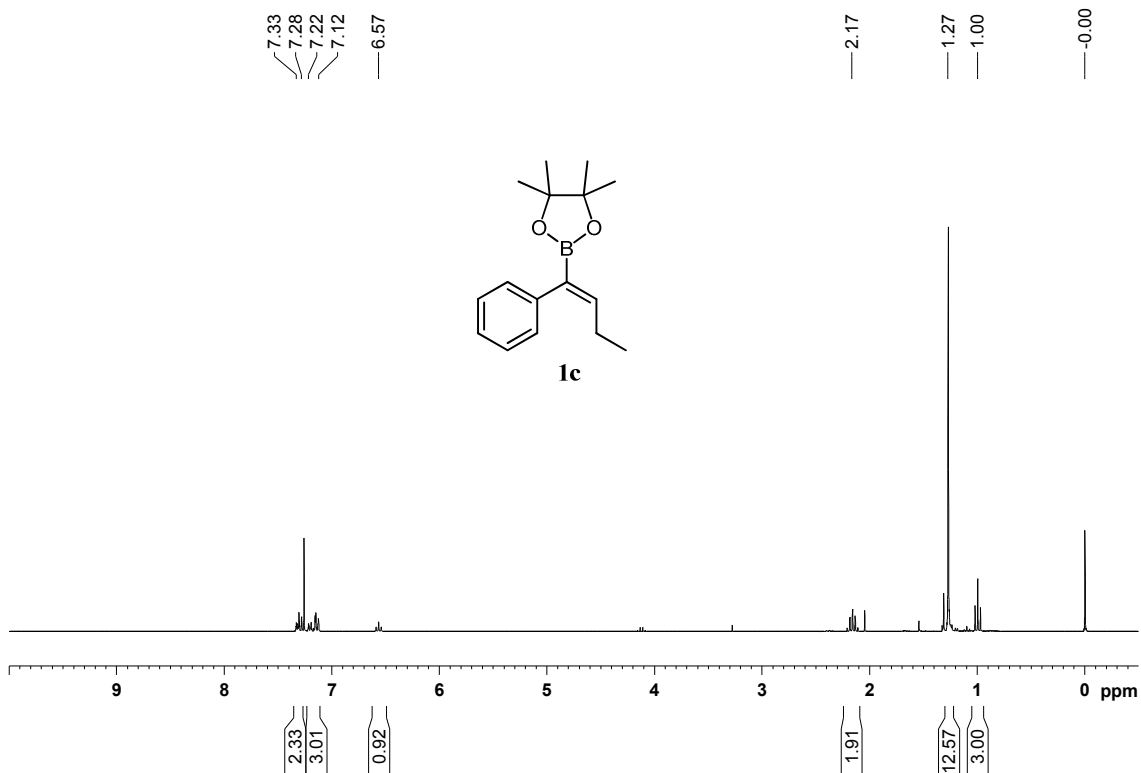

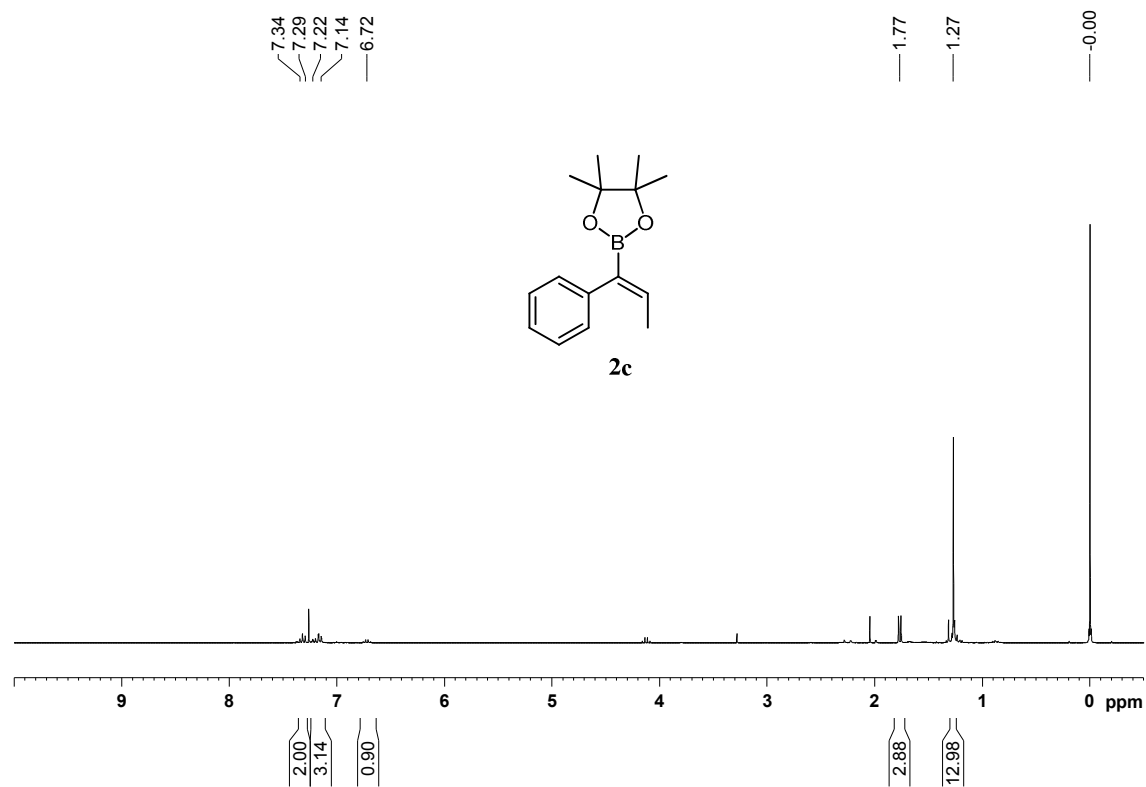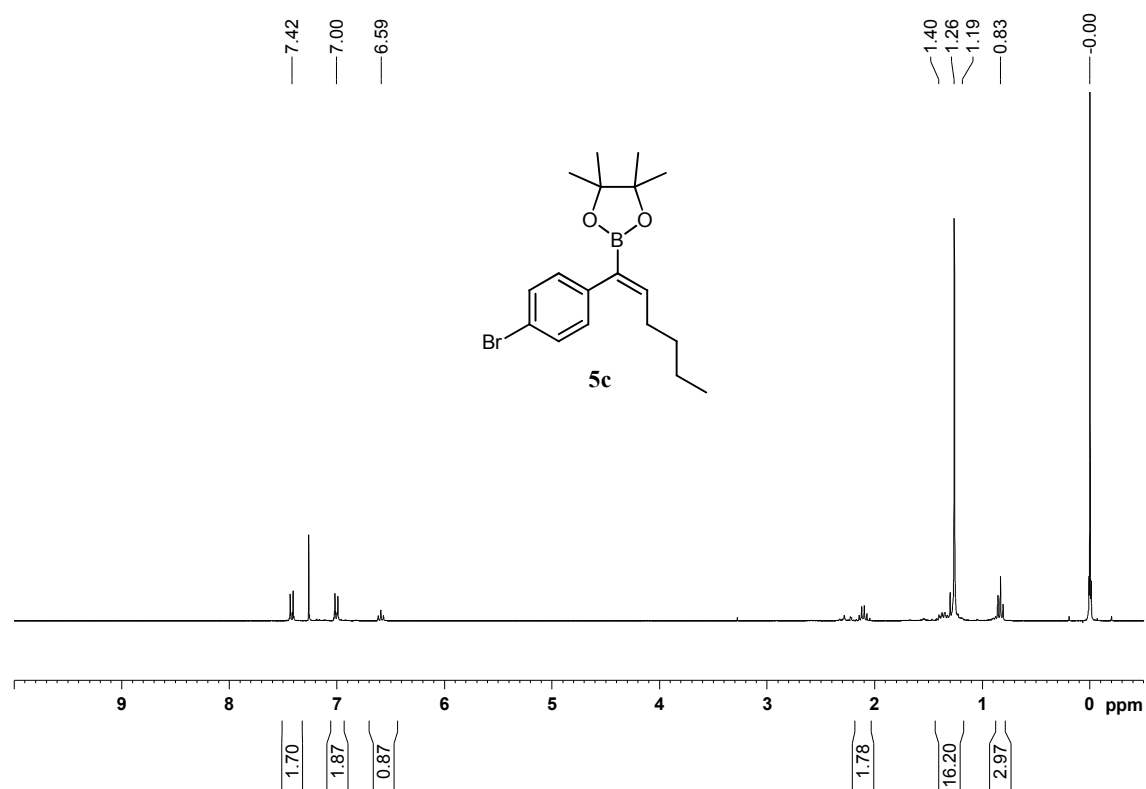

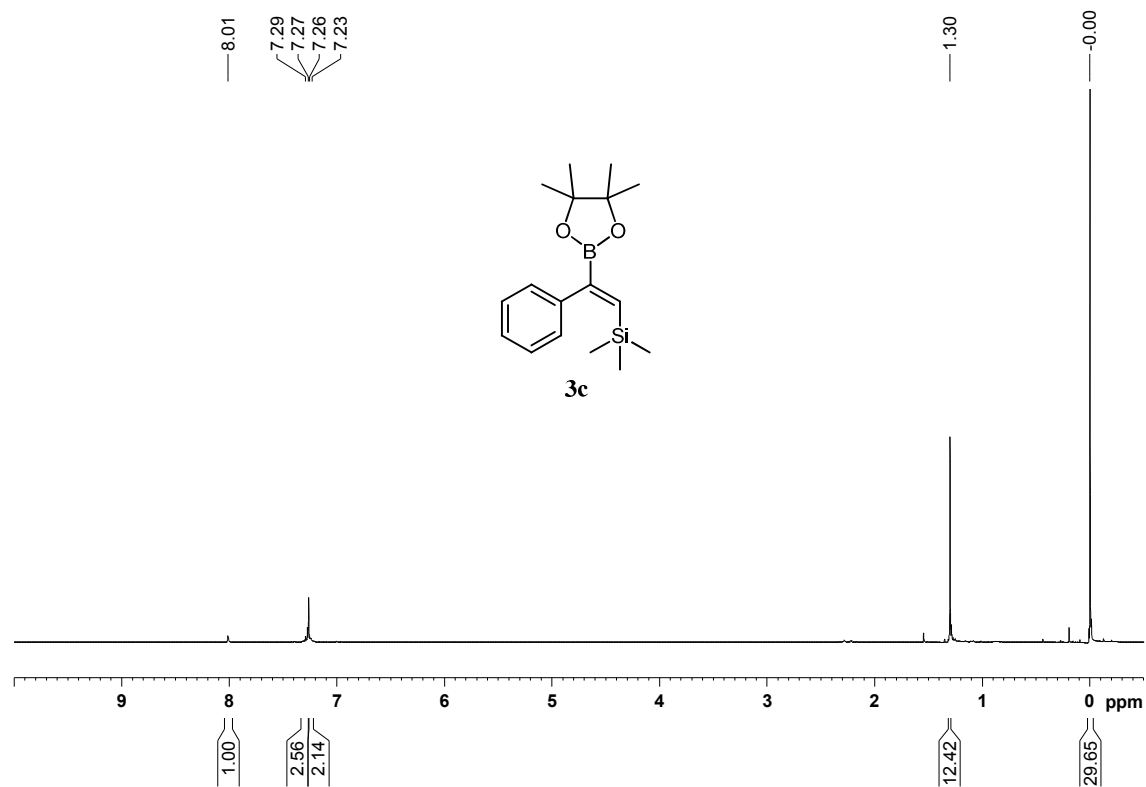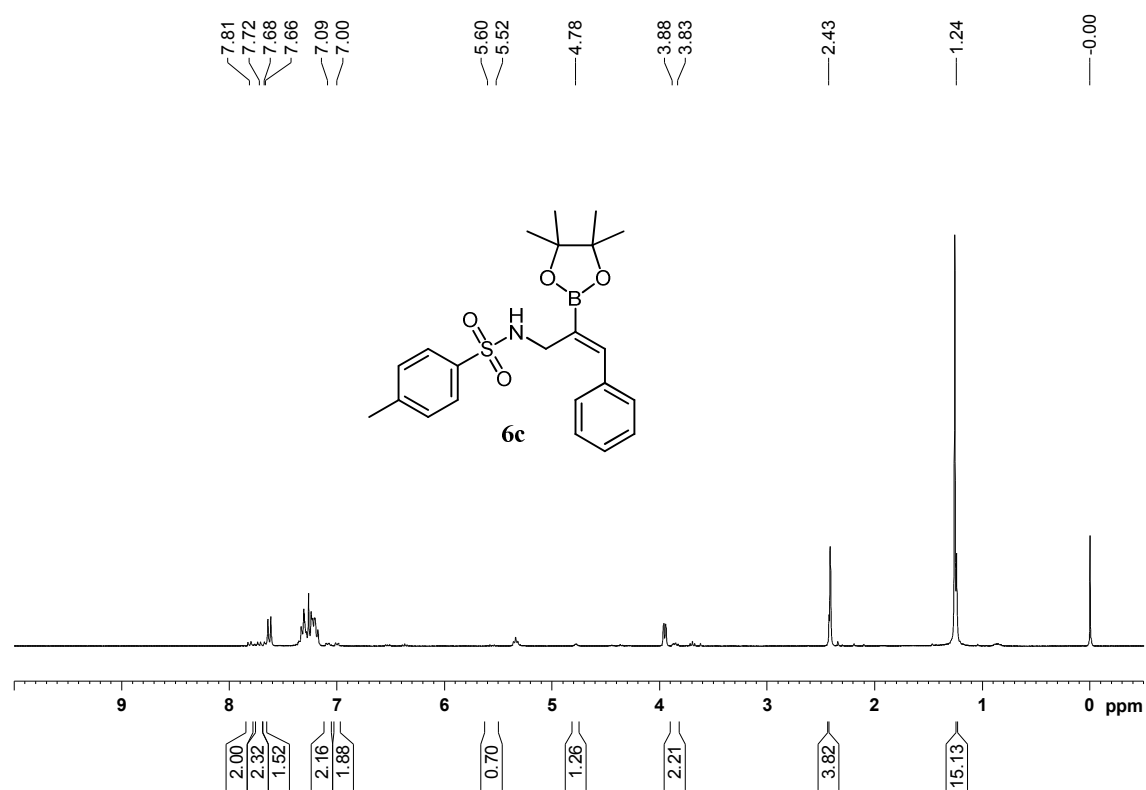



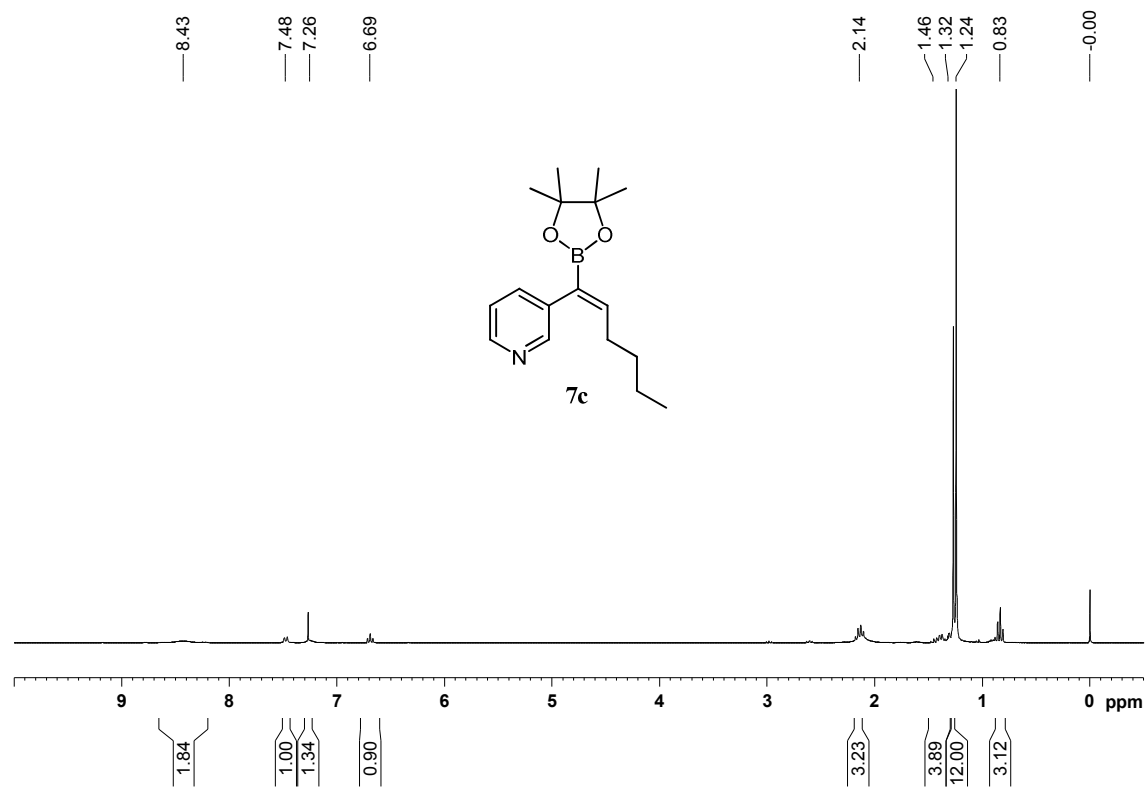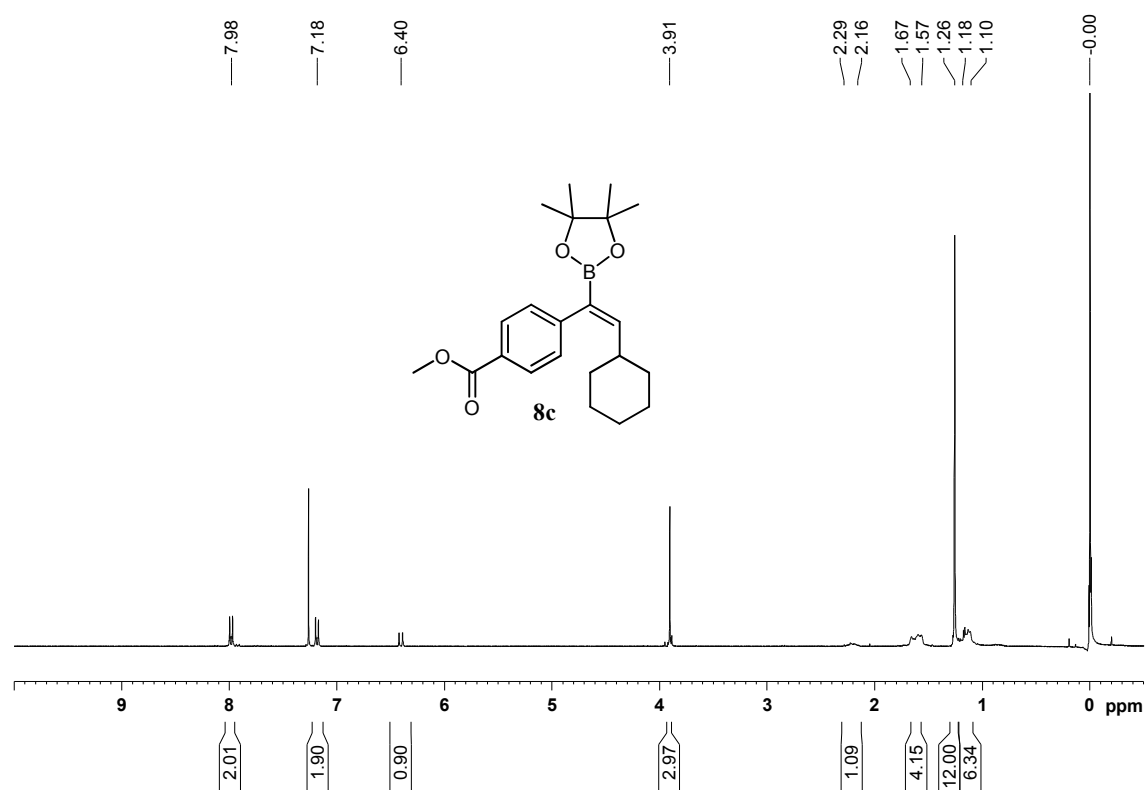

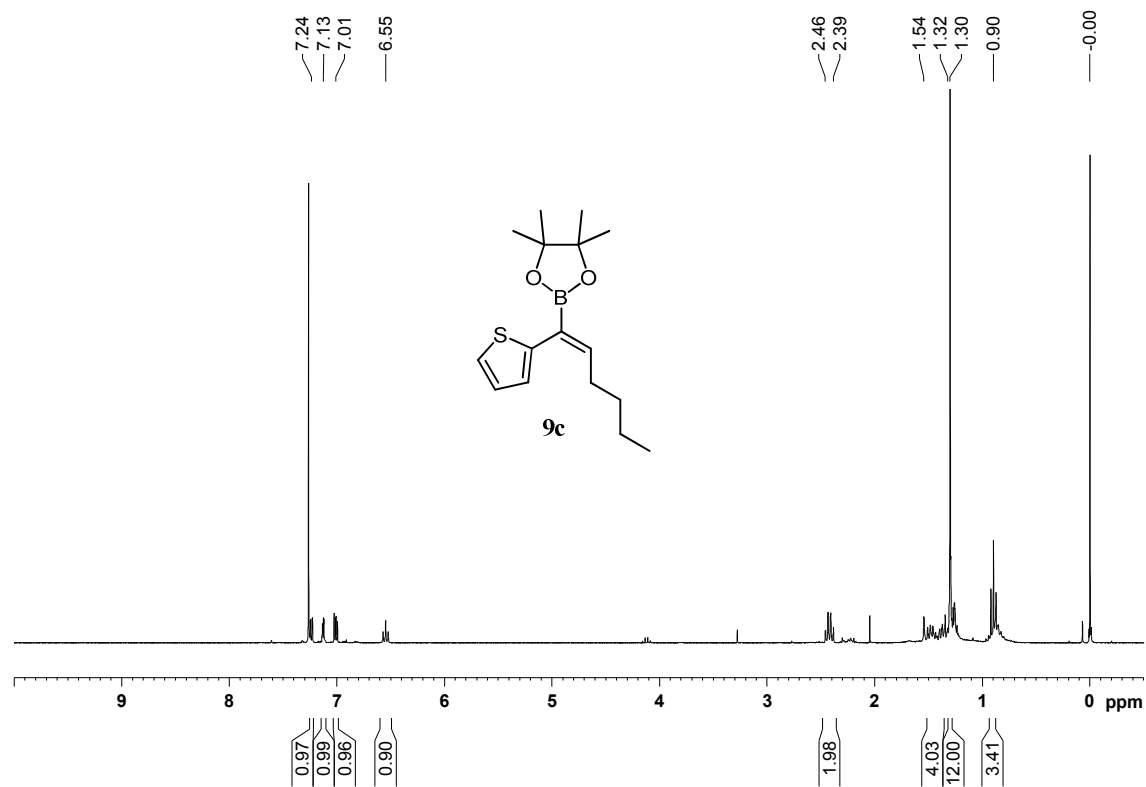

## 6. References

- [1] a) Díez-Gonzalez, S.; Escudero-Adan, E. C.; Benet-Buchholz, J.; Stevens, E. D.; Slawin, A. M. Z.; Nolan, S. P.; *Dalton Trans.*, **2010**, 39, 7595-7606. b) Citadelle, C. A.; Le Nouy, E.; Bisaro, F.; Slawin, A. M. Z.; Cazin, C. S. J.; *Dalton Trans.* **2010**, 39, 4489-4491. c) Lazreg, F.; Slawin, A. M. Z.; Cazin C. S. J.; *Organometallics*, **2012**, 31, 7969-7975.
- [2] Oskooie, H. A.; Heravi, M. M.; Behbahani, F. K.; *Molecules*, **2007**, 12, 1438-1446.
- [3] Semba, K.; Fujihara, T.; Terao, J.; Tsuji, Y.; *Chem. Eur. J.* **2012**, 18, 4179-4184.
- [4] Yan, M.; Jin, T.; Ishikawa, Y.; Minato, T.; Fujita, T.; Chen, L.; Bao, M.; Asao, N.; Chen, M.; Yamamoto, Y.; *J. Am. Chem. Soc.*, **2012**, 134, 17536-17542.
- [5] Kim, H.-R.; Yun, J.; *Chem. Commun*, **2011**, 47, 2943-2945.
- [6] Reed, M. A.; Chang, M. T.; Snieckus, V.; *Org. Lett.*, **2004**, 6, 2297-2300.
- [7] Moure, A. L.; Gomez Arayas, R.; Cardenas, D. J.; Alonso, I.; Carretero, J. C.; *J. Am. Chem. Soc.* **2012**, 134, 7219-7222.
- [8] Alfaro, R.; Parra, A.; Aleman, J.; Garcia Ruano, J. L.; Tortosa, M.; *J. Am. Chem. Soc.* **2012**, 134, 15165-15168.
